# Supplementary material
Source: publisher figshare collection journal article supplement (https://gsajournals.figshare.com/ndownloader/files/14675426)
Supplement: Supplementary file 1 [file 14675426]

## Sheet: #2
frame	time	PC	TB	ant isth	mid isth	post isth
1	00:00:00
2	00:00:00.040000
3	00:00:00.079000
4	00:00:00.133000
5	00:00:00.173000
6	00:00:00.213000
7	00:00:00.253000
8	00:00:00.293000
9	00:00:00.333000
10	00:00:00.373000
11	00:00:00.413000
12	00:00:00.453000
13	00:00:00.483000
14	00:00:00.523000
15	00:00:00.563000
16	00:00:00.594000
17	00:00:00.632000
18	00:00:00.672000
19	00:00:00.711000
20	00:00:00.751000
21	00:00:00.790000
22	00:00:00.830000
23	00:00:00.869000
24	00:00:00.909000
25	00:00:00.948000
26	00:00:00.988000
27	00:00:01.027000
28	00:00:01.067000
29	00:00:01.106000
30	00:00:01.146000
31	00:00:01.185000
32	00:00:01.225000
33	00:00:01.264000
34	00:00:01.304000
35	00:00:01.343000
36	00:00:01.383000
37	00:00:01.423000
38	00:00:01.462000
39	00:00:01.502000
40	00:00:01.541000
41	00:00:01.581000
42	00:00:01.620000
43	00:00:01.660000
44	00:00:01.699000
45	00:00:01.739000
46	00:00:01.778000
47	00:00:01.818000
48	00:00:01.857000
49	00:00:01.897000
50	00:00:01.936000
51	00:00:01.976000
52	00:00:02.015000
53	00:00:02.055000
54	00:00:02.094000
55	00:00:02.134000
56	00:00:02.173000
57	00:00:02.213000
58	00:00:02.252000
59	00:00:02.292000
60	00:00:02.331000
61	00:00:02.371000
62	00:00:02.410000
63	00:00:02.450000
64	00:00:02.489000
65	00:00:02.529000
66	00:00:02.568000
67	00:00:02.608000
68	00:00:02.647000
69	00:00:02.687000
70	00:00:02.726000
71	00:00:02.766000
72	00:00:02.805000
73	00:00:02.845000
74	00:00:02.884000
75	00:00:02.924000
76	00:00:02.964000
77	00:00:03.003000
78	00:00:03.042000
79	00:00:03.082000
80	00:00:03.121000
81	00:00:03.161000
82	00:00:03.201000
83	00:00:03.240000
84	00:00:03.280000
85	00:00:03.319000
86	00:00:03.359000
87	00:00:03.398000
88	00:00:03.438000
89	00:00:03.477000
90	00:00:03.517000
91	00:00:03.556000
92	00:00:03.596000
93	00:00:03.635000
94	00:00:03.675000
95	00:00:03.714000
96	00:00:03.754000
97	00:00:03.793000
98	00:00:03.833000
99	00:00:03.872000
100	00:00:03.912000
101	00:00:03.951000
102	00:00:03.991000
103	00:00:04.030000
104	00:00:04.070000
105	00:00:04.109000
106	00:00:04.149000
107	00:00:04.188000
108	00:00:04.228000
109	00:00:04.267000
110	00:00:04.307000
111	00:00:04.346000
112	00:00:04.386000
113	00:00:04.425000
114	00:00:04.465000
115	00:00:04.504000
116	00:00:04.544000
117	00:00:04.583000
118	00:00:04.623000
119	00:00:04.662000
120	00:00:04.702000
121	00:00:04.742000
122	00:00:04.781000
123	00:00:04.821000
124	00:00:04.860000
125	00:00:04.900000
126	00:00:04.939000
127	00:00:04.979000
128	00:00:05.018000
129	00:00:05.058000
130	00:00:05.097000
131	00:00:05.137000
132	00:00:05.177000
133	00:00:05.217000
134	00:00:05.256000
135	00:00:05.296000
136	00:00:05.335000
137	00:00:05.375000
138	00:00:05.414000
139	00:00:05.454000
140	00:00:05.493000
141	00:00:05.533000
142	00:00:05.572000
143	00:00:05.612000
144	00:00:05.651000
145	00:00:05.691000
146	00:00:05.730000
147	00:00:05.770000
148	00:00:05.809000
149	00:00:05.849000
150	00:00:05.888000
151	00:00:05.928000
152	00:00:05.967000
153	00:00:06.007000
154	00:00:06.046000
155	00:00:06.086000
156	00:00:06.125000
157	00:00:06.165000
158	00:00:06.204000
159	00:00:06.244000
160	00:00:06.284000
161	00:00:06.323000
162	00:00:06.363000
163	00:00:06.402000
164	00:00:06.442000
165	00:00:06.481000
166	00:00:06.521000
167	00:00:06.560000
168	00:00:06.600000
169	00:00:06.639000
170	00:00:06.679000
171	00:00:06.718000
172	00:00:06.758000
173	00:00:06.797000
174	00:00:06.837000
175	00:00:06.876000
176	00:00:06.916000
177	00:00:06.955000
178	00:00:06.995000
179	00:00:07.034000
180	00:00:07.074000
181	00:00:07.113000
182	00:00:07.153000
183	00:00:07.192000
184	00:00:07.232000
185	00:00:07.271000
186	00:00:07.311000
187	00:00:07.350000
188	00:00:07.390000
189	00:00:07.429000
190	00:00:07.469000
191	00:00:07.508000
192	00:00:07.548000
193	00:00:07.587000
194	00:00:07.627000
195	00:00:07.666000
196	00:00:07.706000
197	00:00:07.746000
198	00:00:07.785000
199	00:00:07.824000
200	00:00:07.864000
201	00:00:07.903000
202	00:00:07.943000
203	00:00:07.982000
204	00:00:08.022000
205	00:00:08.062000
206	00:00:08.101000
207	00:00:08.141000
208	00:00:08.180000
209	00:00:08.220000
210	00:00:08.259000
211	00:00:08.299000
212	00:00:08.338000
213	00:00:08.378000
214	00:00:08.417000
215	00:00:08.457000
216	00:00:08.496000
217	00:00:08.536000
218	00:00:08.575000
219	00:00:08.615000
220	00:00:08.654000
221	00:00:08.694000
222	00:00:08.733000
223	00:00:08.773000
224	00:00:08.812000
225	00:00:08.852000
226	00:00:08.891000
227	00:00:08.931000
228	00:00:08.970000
229	00:00:09.010000
230	00:00:09.049000
231	00:00:09.089000
232	00:00:09.128000
233	00:00:09.168000
234	00:00:09.207000
235	00:00:09.247000
236	00:00:09.286000
237	00:00:09.326000
238	00:00:09.365000
239	00:00:09.405000
240	00:00:09.444000
241	00:00:09.484000
242	00:00:09.523000
243	00:00:09.563000
244	00:00:09.603000
245	00:00:09.642000
246	00:00:09.682000
247	00:00:09.721000
248	00:00:09.761000
249	00:00:09.800000
250	00:00:09.840000
251	00:00:09.879000
252	00:00:09.919000
253	00:00:09.958000
254	00:00:09.998000
255	00:00:10.037000
256	00:00:10.077000
257	00:00:10.116000
258	00:00:10.156000
259	00:00:10.195000
260	00:00:10.235000
261	00:00:10.274000
262	00:00:10.314000
263	00:00:10.353000
264	00:00:10.393000
265	00:00:10.432000
266	00:00:10.472000
267	00:00:10.511000
268	00:00:10.551000
269	00:00:10.590000
270	00:00:10.630000
271	00:00:10.669000
272	00:00:10.709000
273	00:00:10.748000
274	00:00:10.788000
275	00:00:10.827000
276	00:00:10.867000
277	00:00:10.906000
278	00:00:10.946000
279	00:00:10.985000
280	00:00:11.025000
281	00:00:11.065000
282	00:00:11.104000
283	00:00:11.144000
284	00:00:11.183000
285	00:00:11.223000
286	00:00:11.262000
287	00:00:11.302000
288	00:00:11.341000
289	00:00:11.381000
290	00:00:11.420000
291	00:00:11.460000
292	00:00:11.499000
293	00:00:11.539000
294	00:00:11.578000
295	00:00:11.618000
296	00:00:11.657000
297	00:00:11.697000
298	00:00:11.736000
299	00:00:11.776000
300	00:00:11.815000
301	00:00:11.855000
302	00:00:11.894000
303	00:00:11.934000
304	00:00:11.973000
305	00:00:12.013000
306	00:00:12.052000
307	00:00:12.092000
308	00:00:12.131000
309	00:00:12.171000
310	00:00:12.210000
311	00:00:12.250000
312	00:00:12.289000
313	00:00:12.329000
314	00:00:12.368000
315	00:00:12.408000
316	00:00:12.447000
317	00:00:12.487000
318	00:00:12.526000
319	00:00:12.566000
320	00:00:12.606000
321	00:00:12.645000
322	00:00:12.684000
323	00:00:12.724000
324	00:00:12.763000
325	00:00:12.803000
326	00:00:12.842000
327	00:00:12.882000
328	00:00:12.922000
329	00:00:12.961000
330	00:00:13.001000
331	00:00:13.040000
332	00:00:13.080000
333	00:00:13.119000
334	00:00:13.159000
335	00:00:13.198000
336	00:00:13.238000
337	00:00:13.277000
338	00:00:13.317000
339	00:00:13.356000
340	00:00:13.396000
341	00:00:13.435000
342	00:00:13.475000
343	00:00:13.514000
344	00:00:13.554000
345	00:00:13.593000
346	00:00:13.633000
347	00:00:13.672000
348	00:00:13.712000
349	00:00:13.751000
350	00:00:13.791000
351	00:00:13.830000
352	00:00:13.870000
353	00:00:13.909000
354	00:00:13.949000
355	00:00:13.988000
356	00:00:14.028000
357	00:00:14.067000
358	00:00:14.107000
359	00:00:14.146000
360	00:00:14.186000
361	00:00:14.225000
362	00:00:14.265000
363	00:00:14.304000
364	00:00:14.344000
365	00:00:14.384000
366	00:00:14.423000
367	00:00:14.463000
368	00:00:14.502000
369	00:00:14.542000
370	00:00:14.581000
371	00:00:14.621000
372	00:00:14.660000
373	00:00:14.700000
374	00:00:14.739000
375	00:00:14.779000
376	00:00:14.818000
377	00:00:14.858000
378	00:00:14.897000
379	00:00:14.937000
380	00:00:14.976000
381	00:00:15.016000
382	00:00:15.055000
383	00:00:15.095000
384	00:00:15.134000
385	00:00:15.175000
386	00:00:15.214000
387	00:00:15.254000
388	00:00:15.293000
389	00:00:15.333000
390	00:00:15.372000
391	00:00:15.412000
392	00:00:15.451000
393	00:00:15.491000
394	00:00:15.530000
395	00:00:15.570000
396	00:00:15.609000
397	00:00:15.649000
398	00:00:15.688000
399	00:00:15.728000
400	00:00:15.767000
401	00:00:15.807000
402	00:00:15.846000
403	00:00:15.886000
404	00:00:15.926000
405	00:00:15.965000
406	00:00:16.005000
407	00:00:16.044000
408	00:00:16.084000
409	00:00:16.123000
410	00:00:16.163000
411	00:00:16.202000
412	00:00:16.242000
413	00:00:16.281000
414	00:00:16.321000
415	00:00:16.360000
416	00:00:16.400000
417	00:00:16.439000
418	00:00:16.479000
419	00:00:16.518000
420	00:00:16.558000
421	00:00:16.597000
422	00:00:16.637000
423	00:00:16.676000
424	00:00:16.716000
425	00:00:16.755000
426	00:00:16.795000
427	00:00:16.834000
428	00:00:16.874000
429	00:00:16.913000
430	00:00:16.953000
431	00:00:16.992000
432	00:00:17.032000
433	00:00:17.071000
434	00:00:17.111000
435	00:00:17.150000
436	00:00:17.190000
437	00:00:17.229000
438	00:00:17.269000
439	00:00:17.308000
440	00:00:17.348000
441	00:00:17.388000
442	00:00:17.427000
443	00:00:17.466000
444	00:00:17.506000
445	00:00:17.546000
446	00:00:17.585000
447	00:00:17.624000
448	00:00:17.664000
449	00:00:17.704000
450	00:00:17.743000
451	00:00:17.783000
452	00:00:17.822000
453	00:00:17.862000
454	00:00:17.901000
455	00:00:17.941000
456	00:00:17.980000
457	00:00:18.020000
458	00:00:18.059000
459	00:00:18.099000
460	00:00:18.138000
461	00:00:18.178000
462	00:00:18.217000
463	00:00:18.257000
464	00:00:18.296000
465	00:00:18.336000
466	00:00:18.375000
467	00:00:18.415000
468	00:00:18.454000
469	00:00:18.494000
470	00:00:18.533000
471	00:00:18.573000
472	00:00:18.612000
473	00:00:18.652000
474	00:00:18.691000
475	00:00:18.731000
476	00:00:18.770000
477	00:00:18.810000
478	00:00:18.849000
479	00:00:18.889000
480	00:00:18.928000
481	00:00:18.968000
482	00:00:19.007000
483	00:00:19.047000
484	00:00:19.086000
485	00:00:19.126000
486	00:00:19.165000
487	00:00:19.205000
488	00:00:19.245000
489	00:00:19.284000
490	00:00:19.324000
491	00:00:19.363000
492	00:00:19.403000
493	00:00:19.442000
494	00:00:19.482000
495	00:00:19.521000
496	00:00:19.561000
497	00:00:19.600000
498	00:00:19.640000
499	00:00:19.679000
500	00:00:19.719000
501	00:00:19.758000
502	00:00:19.798000
503	00:00:19.837000
504	00:00:19.877000
505	00:00:19.916000
506	00:00:19.956000
507	00:00:19.995000
508	00:00:20.035000
509	00:00:20.074000
510	00:00:20.114000
511	00:00:20.153000
512	00:00:20.193000
513	00:00:20.232000
514	00:00:20.272000
515	00:00:20.311000
516	00:00:20.351000
517	00:00:20.390000
518	00:00:20.430000
519	00:00:20.469000
520	00:00:20.509000
521	00:00:20.548000
522	00:00:20.588000
523	00:00:20.627000
524	00:00:20.667000
525	00:00:20.707000
526	00:00:20.746000
527	00:00:20.786000
528	00:00:20.825000
529	00:00:20.865000
530	00:00:20.904000
531	00:00:20.944000
532	00:00:20.983000
533	00:00:21.023000
534	00:00:21.062000
535	00:00:21.102000
536	00:00:21.141000
537	00:00:21.181000
538	00:00:21.220000
539	00:00:21.260000
540	00:00:21.299000
541	00:00:21.339000
542	00:00:21.378000
543	00:00:21.418000
544	00:00:21.457000
545	00:00:21.497000
546	00:00:21.536000
547	00:00:21.576000
548	00:00:21.615000
549	00:00:21.655000
550	00:00:21.694000
551	00:00:21.734000
552	00:00:21.773000
553	00:00:21.813000
554	00:00:21.852000
555	00:00:21.892000
556	00:00:21.931000
557	00:00:21.971000
558	00:00:22.010000
559	00:00:22.050000
560	00:00:22.089000
561	00:00:22.129000
562	00:00:22.168000
563	00:00:22.208000
564	00:00:22.248000
565	00:00:22.287000
566	00:00:22.326000
567	00:00:22.366000
568	00:00:22.405000
569	00:00:22.445000
570	00:00:22.484000
571	00:00:22.524000
572	00:00:22.564000
573	00:00:22.603000
574	00:00:22.643000
575	00:00:22.682000
576	00:00:22.722000
577	00:00:22.761000
578	00:00:22.801000
579	00:00:22.840000
580	00:00:22.880000
581	00:00:22.919000
582	00:00:22.959000
583	00:00:22.998000
584	00:00:23.038000
585	00:00:23.077000
586	00:00:23.117000
587	00:00:23.156000
588	00:00:23.196000
589	00:00:23.235000
590	00:00:23.275000
591	00:00:23.314000
592	00:00:23.354000
593	00:00:23.393000
594	00:00:23.433000
595	00:00:23.472000
596	00:00:23.512000
597	00:00:23.551000
598	00:00:23.591000
599	00:00:23.630000
600	00:00:23.670000
601	00:00:23.709000
602	00:00:23.749000
603	00:00:23.788000
604	00:00:23.828000
605	00:00:23.867000
606	00:00:23.907000
607	00:00:23.946000
608	00:00:23.986000
609	00:00:24.026000
610	00:00:24.065000
611	00:00:24.105000
612	00:00:24.144000
613	00:00:24.184000
614	00:00:24.223000
615	00:00:24.263000
616	00:00:24.302000
617	00:00:24.342000
618	00:00:24.381000
619	00:00:24.421000
620	00:00:24.460000
621	00:00:24.500000
	00:00:24.539000
	00:00:24.579000
	00:00:24.618000
	00:00:24.658000

## Sheet: #4
frame	time	PC	TB	ant isth	mid isth	post isth
354	00:00:13.949000
355	00:00:13.988000
356	00:00:14.028000
357	00:00:14.067000
358	00:00:14.107000
359	00:00:14.146000
360	00:00:14.186000
361	00:00:14.225000
362	00:00:14.265000
363	00:00:14.304000
364	00:00:14.344000
365	00:00:14.383000
366	00:00:14.423000
367	00:00:14.462000
368	00:00:14.502000
369	00:00:14.541000
370	00:00:14.581000
371	00:00:14.620000
372	00:00:14.660000
373	00:00:14.699000
374	00:00:14.739000
375	00:00:14.778000
376	00:00:14.818000
377	00:00:14.858000
378	00:00:14.897000
379	00:00:14.937000
380	00:00:14.976000
381	00:00:15.016000
382	00:00:15.055000
383	00:00:15.095000
384	00:00:15.134000
385	00:00:15.174000
386	00:00:15.214000
387	00:00:15.254000
388	00:00:15.293000
389	00:00:15.333000
390	00:00:15.372000
391	00:00:15.412000
392	00:00:15.451000
393	00:00:15.491000
394	00:00:15.530000
395	00:00:15.570000
396	00:00:15.609000
397	00:00:15.649000
398	00:00:15.688000
399	00:00:15.728000
400	00:00:15.767000
401	00:00:15.807000
402	00:00:15.846000
403	00:00:15.886000
404	00:00:15.925000
405	00:00:15.965000
406	00:00:16.004000
407	00:00:16.044000
408	00:00:16.083000
409	00:00:16.123000
410	00:00:16.162000
411	00:00:16.202000
412	00:00:16.241000
413	00:00:16.281000
414	00:00:16.321000
415	00:00:16.360000
416	00:00:16.400000
417	00:00:16.439000
418	00:00:16.478000
419	00:00:16.518000
420	00:00:16.557000
421	00:00:16.597000
422	00:00:16.637000
423	00:00:16.676000
424	00:00:16.716000
425	00:00:16.755000
426	00:00:16.795000
427	00:00:16.834000
428	00:00:16.874000
429	00:00:16.913000
430	00:00:16.953000
431	00:00:16.992000
432	00:00:17.032000
433	00:00:17.071000
434	00:00:17.111000
435	00:00:17.150000
436	00:00:17.190000
437	00:00:17.229000
438	00:00:17.269000
439	00:00:17.308000
440	00:00:17.348000
441	00:00:17.387000
442	00:00:17.427000
443	00:00:17.466000
444	00:00:17.506000
445	00:00:17.545000
446	00:00:17.585000
447	00:00:17.624000
448	00:00:17.664000
449	00:00:17.703000
450	00:00:17.743000
451	00:00:17.782000
452	00:00:17.822000
453	00:00:17.861000
454	00:00:17.901000
455	00:00:17.940000
456	00:00:17.980000
457	00:00:18.019000
458	00:00:18.059000
459	00:00:18.098000
460	00:00:18.138000
461	00:00:18.178000
462	00:00:18.217000
463	00:00:18.257000
464	00:00:18.296000
465	00:00:18.336000
466	00:00:18.375000
467	00:00:18.415000
468	00:00:18.454000
469	00:00:18.494000
470	00:00:18.533000
471	00:00:18.573000
472	00:00:18.612000
473	00:00:18.652000
474	00:00:18.691000
475	00:00:18.731000
476	00:00:18.770000
477	00:00:18.810000
478	00:00:18.849000
479	00:00:18.889000
480	00:00:18.928000
481	00:00:18.968000
482	00:00:19.007000
483	00:00:19.047000
484	00:00:19.086000
485	00:00:19.126000
486	00:00:19.165000
487	00:00:19.205000
488	00:00:19.244000
489	00:00:19.284000
490	00:00:19.323000
491	00:00:19.363000
492	00:00:19.402000
493	00:00:19.442000
494	00:00:19.481000
495	00:00:19.521000
496	00:00:19.560000
497	00:00:19.600000
498	00:00:19.640000
499	00:00:19.679000
500	00:00:19.719000
501	00:00:19.758000
502	00:00:19.798000
503	00:00:19.837000
504	00:00:19.877000
505	00:00:19.916000
506	00:00:19.956000
507	00:00:19.995000
508	00:00:20.035000
509	00:00:20.074000
510	00:00:20.114000
511	00:00:20.153000
512	00:00:20.193000
513	00:00:20.232000
514	00:00:20.272000
515	00:00:20.311000
516	00:00:20.351000
517	00:00:20.390000
518	00:00:20.430000
519	00:00:20.469000
520	00:00:20.509000
521	00:00:20.548000
522	00:00:20.588000
523	00:00:20.627000
524	00:00:20.667000
525	00:00:20.706000
526	00:00:20.746000
527	00:00:20.785000
528	00:00:20.825000
529	00:00:20.864000
530	00:00:20.904000
531	00:00:20.943000
532	00:00:20.983000
533	00:00:21.022000
534	00:00:21.062000
535	00:00:21.101000
536	00:00:21.141000
537	00:00:21.181000
538	00:00:21.220000
539	00:00:21.260000
540	00:00:21.299000
541	00:00:21.339000
542	00:00:21.378000
543	00:00:21.418000
544	00:00:21.457000
545	00:00:21.497000
546	00:00:21.536000
547	00:00:21.576000
548	00:00:21.615000
549	00:00:21.655000
550	00:00:21.694000
551	00:00:21.734000
552	00:00:21.773000
553	00:00:21.813000
554	00:00:21.852000
555	00:00:21.892000
556	00:00:21.931000
557	00:00:21.971000
558	00:00:22.010000
559	00:00:22.050000
560	00:00:22.089000
561	00:00:22.129000
562	00:00:22.168000
563	00:00:22.208000
564	00:00:22.247000
565	00:00:22.287000
566	00:00:22.326000
567	00:00:22.366000
568	00:00:22.405000
569	00:00:22.445000
570	00:00:22.484000
571	00:00:22.524000
572	00:00:22.563000
573	00:00:22.603000
574	00:00:22.642000
575	00:00:22.682000
576	00:00:22.721000
577	00:00:22.761000
578	00:00:22.800000
579	00:00:22.840000
580	00:00:22.879000
581	00:00:22.919000
582	00:00:22.959000
583	00:00:22.998000
584	00:00:23.038000
585	00:00:23.077000
586	00:00:23.117000
587	00:00:23.156000
588	00:00:23.196000
589	00:00:23.235000
590	00:00:23.275000
591	00:00:23.314000
592	00:00:23.354000
593	00:00:23.393000
594	00:00:23.433000
595	00:00:23.472000
596	00:00:23.512000
597	00:00:23.551000
598	00:00:23.591000
599	00:00:23.630000
600	00:00:23.670000
601	00:00:23.709000
602	00:00:23.749000
603	00:00:23.788000
604	00:00:23.828000
605	00:00:23.867000
606	00:00:23.907000
607	00:00:23.946000
608	00:00:23.986000
609	00:00:24.025000
610	00:00:24.065000
611	00:00:24.104000
612	00:00:24.144000
613	00:00:24.183000
614	00:00:24.223000
615	00:00:24.262000
616	00:00:24.302000
617	00:00:24.341000
618	00:00:24.381000
619	00:00:24.420000
620	00:00:24.460000
621	00:00:24.500000
622	00:00:24.539000
623	00:00:24.579000
624	00:00:24.618000
625	00:00:24.658000
626	00:00:24.697000
627	00:00:24.737000
628	00:00:24.776000
629	00:00:24.816000
630	00:00:24.855000
631	00:00:24.895000
632	00:00:24.934000
633	00:00:24.974000
634	00:00:25.013000
635	00:00:25.053000
636	00:00:25.092000
637	00:00:25.132000
638	00:00:25.171000
639	00:00:25.212000
640	00:00:25.251000
641	00:00:25.291000
642	00:00:25.330000
643	00:00:25.370000
644	00:00:25.409000
645	00:00:25.449000
646	00:00:25.488000
647	00:00:25.528000
648	00:00:25.567000
649	00:00:25.607000
650	00:00:25.646000
651	00:00:25.686000
652	00:00:25.725000
653	00:00:25.765000
654	00:00:25.804000
655	00:00:25.844000
656	00:00:25.883000
657	00:00:25.923000
658	00:00:25.962000
659	00:00:26.002000
660	00:00:26.042000
661	00:00:26.081000
662	00:00:26.120000
663	00:00:26.160000
664	00:00:26.199000
665	00:00:26.239000
666	00:00:26.279000
667	00:00:26.318000
668	00:00:26.358000
669	00:00:26.397000
670	00:00:26.437000
671	00:00:26.476000
672	00:00:26.516000
673	00:00:26.555000
674	00:00:26.595000
675	00:00:26.634000
676	00:00:26.674000
677	00:00:26.713000
678	00:00:26.753000
679	00:00:26.792000
680	00:00:26.832000
681	00:00:26.871000
682	00:00:26.911000
683	00:00:26.950000
684	00:00:26.990000
685	00:00:27.029000
686	00:00:27.069000
687	00:00:27.108000
688	00:00:27.148000
689	00:00:27.187000
690	00:00:27.227000
691	00:00:27.266000
692	00:00:27.306000
693	00:00:27.345000
694	00:00:27.385000
695	00:00:27.424000
696	00:00:27.464000
697	00:00:27.503000
698	00:00:27.543000
699	00:00:27.583000
700	00:00:27.622000
701	00:00:27.661000
702	00:00:27.701000
703	00:00:27.740000
704	00:00:27.780000
705	00:00:27.820000
706	00:00:27.859000
707	00:00:27.899000
708	00:00:27.938000
709	00:00:27.978000
710	00:00:28.017000
711	00:00:28.057000
712	00:00:28.096000
713	00:00:28.136000
714	00:00:28.175000
715	00:00:28.215000
716	00:00:28.254000
717	00:00:28.294000
718	00:00:28.333000
719	00:00:28.373000
720	00:00:28.412000
721	00:00:28.452000
722	00:00:28.491000
723	00:00:28.531000
724	00:00:28.570000
725	00:00:28.610000
726	00:00:28.649000
727	00:00:28.689000
728	00:00:28.728000
729	00:00:28.768000
730	00:00:28.807000
731	00:00:28.847000
732	00:00:28.886000
733	00:00:28.926000
734	00:00:28.965000
735	00:00:29.005000
736	00:00:29.044000
737	00:00:29.084000
738	00:00:29.123000
739	00:00:29.163000
740	00:00:29.202000
741	00:00:29.242000
742	00:00:29.281000
743	00:00:29.321000
744	00:00:29.361000
745	00:00:29.400000
746	00:00:29.440000
747	00:00:29.479000
748	00:00:29.519000
749	00:00:29.558000
750	00:00:29.598000
751	00:00:29.637000
752	00:00:29.677000
753	00:00:29.716000
754	00:00:29.756000
755	00:00:29.795000
756	00:00:29.835000
757	00:00:29.874000
758	00:00:29.914000
759	00:00:29.953000
760	00:00:29.993000
761	00:00:30.032000
762	00:00:30.072000
763	00:00:30.111000
764	00:00:30.151000
765	00:00:30.190000
766	00:00:30.230000
767	00:00:30.269000
768	00:00:30.309000
769	00:00:30.348000
770	00:00:30.388000
771	00:00:30.427000
772	00:00:30.467000
773	00:00:30.506000
774	00:00:30.546000
775	00:00:30.585000
776	00:00:30.625000
777	00:00:30.664000
778	00:00:30.704000
779	00:00:30.743000
780	00:00:30.783000
781	00:00:30.823000
782	00:00:30.862000
783	00:00:30.902000
784	00:00:30.941000
785	00:00:30.981000
786	00:00:31.020000
787	00:00:31.059000
788	00:00:31.099000
789	00:00:31.139000
790	00:00:31.178000
791	00:00:31.218000
792	00:00:31.257000
793	00:00:31.297000
794	00:00:31.336000
795	00:00:31.376000
796	00:00:31.415000
797	00:00:31.455000
798	00:00:31.494000
799	00:00:31.534000
800	00:00:31.573000
801	00:00:31.613000
802	00:00:31.652000
803	00:00:31.692000
804	00:00:31.731000
805	00:00:31.771000
806	00:00:31.810000
807	00:00:31.850000
808	00:00:31.889000
809	00:00:31.929000
810	00:00:31.968000
811	00:00:32.008000
812	00:00:32.047000
813	00:00:32.087000
814	00:00:32.126000
815	00:00:32.166000
816	00:00:32.205000
817	00:00:32.245000
818	00:00:32.284000
819	00:00:32.324000
820	00:00:32.364000
821	00:00:32.403000
822	00:00:32.442000
823	00:00:32.482000
824	00:00:32.521000
825	00:00:32.561000
826	00:00:32.601000
827	00:00:32.640000
828	00:00:32.680000
829	00:00:32.719000
830	00:00:32.759000
831	00:00:32.798000
832	00:00:32.838000
833	00:00:32.877000
834	00:00:32.917000
835	00:00:32.956000
836	00:00:32.996000
837	00:00:33.035000
838	00:00:33.075000
839	00:00:33.114000
840	00:00:33.154000
841	00:00:33.193000
842	00:00:33.233000
843	00:00:33.272000
844	00:00:33.312000
845	00:00:33.351000
846	00:00:33.391000
847	00:00:33.430000
848	00:00:33.470000
849	00:00:33.509000
850	00:00:33.549000
851	00:00:33.588000
852	00:00:33.628000
853	00:00:33.667000
854	00:00:33.707000
855	00:00:33.746000
856	00:00:33.786000
857	00:00:33.825000
858	00:00:33.865000
859	00:00:33.904000
860	00:00:33.944000
861	00:00:33.983000
862	00:00:34.023000
863	00:00:34.062000
864	00:00:34.102000
865	00:00:34.142000
866	00:00:34.181000
867	00:00:34.221000
868	00:00:34.260000
869	00:00:34.300000
870	00:00:34.339000
871	00:00:34.379000
872	00:00:34.418000
873	00:00:34.458000
874	00:00:34.497000
875	00:00:34.537000
876	00:00:34.576000
877	00:00:34.616000
878	00:00:34.655000
879	00:00:34.695000
880	00:00:34.734000
881	00:00:34.774000
882	00:00:34.813000
883	00:00:34.853000
884	00:00:34.892000
885	00:00:34.932000
886	00:00:34.971000
887	00:00:35.011000
888	00:00:35.050000
889	00:00:35.090000
890	00:00:35.129000
891	00:00:35.169000
892	00:00:35.209000
893	00:00:35.249000
894	00:00:35.288000
895	00:00:35.328000
896	00:00:35.367000
897	00:00:35.407000
898	00:00:35.446000
899	00:00:35.486000
900	00:00:35.525000
901	00:00:35.565000
902	00:00:35.604000
903	00:00:35.644000
904	00:00:35.684000
905	00:00:35.723000
906	00:00:35.763000
907	00:00:35.802000
908	00:00:35.842000
909	00:00:35.881000
910	00:00:35.921000
911	00:00:35.960000
912	00:00:36
913	00:00:36.039000
914	00:00:36.079000
915	00:00:36.118000
916	00:00:36.158000
917	00:00:36.197000
918	00:00:36.237000
919	00:00:36.276000
920	00:00:36.316000
921	00:00:36.355000
922	00:00:36.395000
923	00:00:36.434000
924	00:00:36.474000
925	00:00:36.513000
926	00:00:36.553000
927	00:00:36.592000
928	00:00:36.632000
929	00:00:36.671000
930	00:00:36.711000
931	00:00:36.750000
932	00:00:36.790000
933	00:00:36.829000
934	00:00:36.869000
935	00:00:36.908000
936	00:00:36.948000
937	00:00:36.987000
938	00:00:37.027000
939	00:00:37.066000
940	00:00:37.106000
941	00:00:37.145000
942	00:00:37.185000
943	00:00:37.224000
944	00:00:37.264000
945	00:00:37.303000
946	00:00:37.343000
947	00:00:37.382000
948	00:00:37.422000
949	00:00:37.462000
950	00:00:37.501000
951	00:00:37.541000
952	00:00:37.580000
953	00:00:37.620000
954	00:00:37.659000
955	00:00:37.699000
956	00:00:37.738000
957	00:00:37.778000
958	00:00:37.817000
959	00:00:37.857000
960	00:00:37.896000
961	00:00:37.936000
962	00:00:37.975000
963	00:00:38.015000
964	00:00:38.054000
965	00:00:38.094000
966	00:00:38.133000
967	00:00:38.173000
968	00:00:38.212000
969	00:00:38.252000
970	00:00:38.291000
971	00:00:38.331000
972	00:00:38.370000
973	00:00:38.410000
974	00:00:38.449000
975	00:00:38.489000
976	00:00:38.528000
977	00:00:38.568000
978	00:00:38.607000
979	00:00:38.647000
980	00:00:38.686000
981	00:00:38.726000
982	00:00:38.765000
983	00:00:38.805000
984	00:00:38.844000
985	00:00:38.884000
986	00:00:38.923000
987	00:00:38.963000
988	00:00:39.003000
989	00:00:39.042000
990	00:00:39.082000
991	00:00:39.121000
992	00:00:39.161000
993	00:00:39.200000
994	00:00:39.240000
995	00:00:39.279000
996	00:00:39.319000
997	00:00:39.358000
998	00:00:39.398000
999	00:00:39.437000
1000	00:00:39.477000

## Sheet: #5
frame	time	PC	TB	ant isth	mid isth	post isth
600	00:00:23.670000
601	00:00:23.709000
602	00:00:23.749000
603	00:00:23.789000
604	00:00:23.828000
605	00:00:23.868000
606	00:00:23.907000
607	00:00:23.947000
608	00:00:23.986000
609	00:00:24.026000
610	00:00:24.065000
611	00:00:24.105000
612	00:00:24.144000
613	00:00:24.184000
614	00:00:24.223000
615	00:00:24.263000
616	00:00:24.302000
617	00:00:24.342000
618	00:00:24.381000
619	00:00:24.421000
620	00:00:24.460000
621	00:00:24.500000
622	00:00:24.539000
623	00:00:24.579000
624	00:00:24.618000
625	00:00:24.658000
626	00:00:24.697000
627	00:00:24.737000
628	00:00:24.776000
629	00:00:24.816000
630	00:00:24.855000
631	00:00:24.895000
632	00:00:24.934000
633	00:00:24.974000
634	00:00:25.013000
635	00:00:25.053000
636	00:00:25.092000
637	00:00:25.132000
638	00:00:25.171000
639	00:00:25.212000
640	00:00:25.252000
641	00:00:25.291000
642	00:00:25.331000
643	00:00:25.370000
644	00:00:25.410000
645	00:00:25.449000
646	00:00:25.488000
647	00:00:25.528000
648	00:00:25.568000
649	00:00:25.607000
650	00:00:25.647000
651	00:00:25.686000
652	00:00:25.726000
653	00:00:25.765000
654	00:00:25.805000
655	00:00:25.844000
656	00:00:25.884000
657	00:00:25.923000
658	00:00:25.963000
659	00:00:26.002000
660	00:00:26.042000
661	00:00:26.081000
662	00:00:26.121000
663	00:00:26.160000
664	00:00:26.200000
665	00:00:26.239000
666	00:00:26.279000
667	00:00:26.318000
668	00:00:26.358000
669	00:00:26.397000
670	00:00:26.437000
671	00:00:26.476000
672	00:00:26.516000
673	00:00:26.555000
674	00:00:26.595000
675	00:00:26.634000
676	00:00:26.674000
677	00:00:26.713000
678	00:00:26.753000
679	00:00:26.792000
680	00:00:26.832000
681	00:00:26.871000
682	00:00:26.911000
683	00:00:26.950000
684	00:00:26.990000
685	00:00:27.029000
686	00:00:27.069000
687	00:00:27.109000
688	00:00:27.148000
689	00:00:27.188000
690	00:00:27.227000
691	00:00:27.267000
692	00:00:27.306000
693	00:00:27.346000
694	00:00:27.385000
695	00:00:27.425000
696	00:00:27.464000
697	00:00:27.504000
698	00:00:27.543000
699	00:00:27.583000
700	00:00:27.622000
701	00:00:27.662000
702	00:00:27.701000
703	00:00:27.741000
704	00:00:27.780000
705	00:00:27.820000
706	00:00:27.859000
707	00:00:27.899000
708	00:00:27.938000
709	00:00:27.978000
710	00:00:28.017000
711	00:00:28.057000
712	00:00:28.096000
713	00:00:28.136000
714	00:00:28.175000
715	00:00:28.215000
716	00:00:28.254000
717	00:00:28.294000
718	00:00:28.333000
719	00:00:28.373000
720	00:00:28.412000
721	00:00:28.452000
722	00:00:28.491000
723	00:00:28.531000
724	00:00:28.571000
725	00:00:28.610000
726	00:00:28.650000
727	00:00:28.689000
728	00:00:28.729000
729	00:00:28.768000
730	00:00:28.808000
731	00:00:28.847000
732	00:00:28.887000
733	00:00:28.926000
734	00:00:28.966000
735	00:00:29.005000
736	00:00:29.045000
737	00:00:29.084000
738	00:00:29.124000
739	00:00:29.163000
740	00:00:29.203000
741	00:00:29.242000
742	00:00:29.282000
743	00:00:29.321000
744	00:00:29.361000
745	00:00:29.400000
746	00:00:29.440000
747	00:00:29.479000
748	00:00:29.519000
749	00:00:29.558000
750	00:00:29.598000
751	00:00:29.637000
752	00:00:29.677000
753	00:00:29.716000
754	00:00:29.756000
755	00:00:29.795000
756	00:00:29.835000
757	00:00:29.874000
758	00:00:29.914000
759	00:00:29.953000
760	00:00:29.993000
761	00:00:30.032000
762	00:00:30.072000
763	00:00:30.112000
764	00:00:30.151000
765	00:00:30.191000
766	00:00:30.230000
767	00:00:30.270000
768	00:00:30.309000
769	00:00:30.349000
770	00:00:30.388000
771	00:00:30.428000
772	00:00:30.467000
773	00:00:30.507000
774	00:00:30.546000
775	00:00:30.586000
776	00:00:30.625000
777	00:00:30.665000
778	00:00:30.704000
779	00:00:30.744000
780	00:00:30.783000
781	00:00:30.823000
782	00:00:30.862000
783	00:00:30.902000
784	00:00:30.941000
785	00:00:30.981000
786	00:00:31.020000
787	00:00:31.060000
788	00:00:31.099000
789	00:00:31.139000
790	00:00:31.178000
791	00:00:31.218000
792	00:00:31.257000
793	00:00:31.297000
794	00:00:31.336000
795	00:00:31.376000
796	00:00:31.415000
797	00:00:31.455000
798	00:00:31.494000
799	00:00:31.534000
800	00:00:31.573000
801	00:00:31.613000
802	00:00:31.652000
803	00:00:31.692000
804	00:00:31.731000
805	00:00:31.771000
806	00:00:31.810000
807	00:00:31.850000
808	00:00:31.890000
809	00:00:31.929000
810	00:00:31.969000
811	00:00:32.008000
812	00:00:32.048000
813	00:00:32.087000
814	00:00:32.127000
815	00:00:32.166000
816	00:00:32.206000
817	00:00:32.245000
818	00:00:32.285000
819	00:00:32.324000
820	00:00:32.364000
821	00:00:32.403000
822	00:00:32.443000
823	00:00:32.482000
824	00:00:32.522000
825	00:00:32.561000
826	00:00:32.601000
827	00:00:32.640000
828	00:00:32.680000
829	00:00:32.719000
830	00:00:32.759000
831	00:00:32.798000
832	00:00:32.838000
833	00:00:32.877000
834	00:00:32.917000
835	00:00:32.956000
836	00:00:32.996000
837	00:00:33.035000
838	00:00:33.075000
839	00:00:33.114000
840	00:00:33.154000
841	00:00:33.193000
842	00:00:33.233000
843	00:00:33.272000
844	00:00:33.312000
845	00:00:33.351000
846	00:00:33.391000
847	00:00:33.431000
848	00:00:33.470000
849	00:00:33.510000
850	00:00:33.549000
851	00:00:33.589000
852	00:00:33.628000
853	00:00:33.668000
854	00:00:33.707000
855	00:00:33.747000
856	00:00:33.786000
857	00:00:33.826000
858	00:00:33.865000
859	00:00:33.905000
860	00:00:33.944000
861	00:00:33.984000
862	00:00:34.023000
863	00:00:34.063000
864	00:00:34.102000
865	00:00:34.142000
866	00:00:34.181000
867	00:00:34.221000
868	00:00:34.260000
869	00:00:34.300000
870	00:00:34.339000
871	00:00:34.379000
872	00:00:34.418000
873	00:00:34.458000
874	00:00:34.497000
875	00:00:34.537000
876	00:00:34.576000
877	00:00:34.616000
878	00:00:34.655000
879	00:00:34.695000
880	00:00:34.734000
881	00:00:34.774000
882	00:00:34.813000
883	00:00:34.853000
884	00:00:34.893000
885	00:00:34.932000
886	00:00:34.972000
887	00:00:35.011000
888	00:00:35.051000
889	00:00:35.090000
890	00:00:35.130000
891	00:00:35.169000
892	00:00:35.210000
893	00:00:35.249000
894	00:00:35.289000
895	00:00:35.328000
896	00:00:35.368000
897	00:00:35.407000
898	00:00:35.447000
899	00:00:35.486000
900	00:00:35.526000
901	00:00:35.565000
902	00:00:35.605000
903	00:00:35.644000
904	00:00:35.684000
905	00:00:35.723000
906	00:00:35.763000
907	00:00:35.802000
908	00:00:35.842000
909	00:00:35.881000
910	00:00:35.921000
911	00:00:35.960000
912	00:00:36
913	00:00:36.039000
914	00:00:36.079000
915	00:00:36.118000
916	00:00:36.158000
917	00:00:36.197000
918	00:00:36.237000
919	00:00:36.276000
920	00:00:36.316000
921	00:00:36.355000
922	00:00:36.395000
923	00:00:36.435000
924	00:00:36.474000
925	00:00:36.513000
926	00:00:36.553000
927	00:00:36.592000
928	00:00:36.632000
929	00:00:36.671000
930	00:00:36.711000
931	00:00:36.751000
932	00:00:36.790000
933	00:00:36.830000
934	00:00:36.869000
935	00:00:36.909000
936	00:00:36.948000
937	00:00:36.988000
938	00:00:37.027000
939	00:00:37.067000
940	00:00:37.106000
941	00:00:37.146000
942	00:00:37.185000
943	00:00:37.225000
944	00:00:37.264000
945	00:00:37.304000
946	00:00:37.343000
947	00:00:37.383000
948	00:00:37.422000
949	00:00:37.462000
950	00:00:37.501000
951	00:00:37.541000
952	00:00:37.580000
953	00:00:37.620000
954	00:00:37.659000
955	00:00:37.699000
956	00:00:37.738000
957	00:00:37.778000
958	00:00:37.817000
959	00:00:37.857000
960	00:00:37.896000
961	00:00:37.936000
962	00:00:37.975000
963	00:00:38.015000
964	00:00:38.054000
965	00:00:38.094000
966	00:00:38.133000
967	00:00:38.173000
968	00:00:38.213000
969	00:00:38.252000
970	00:00:38.292000
971	00:00:38.331000
972	00:00:38.371000
973	00:00:38.410000
974	00:00:38.450000
975	00:00:38.489000
976	00:00:38.529000
977	00:00:38.568000
978	00:00:38.608000
979	00:00:38.647000
980	00:00:38.687000
981	00:00:38.726000
982	00:00:38.766000
983	00:00:38.805000
984	00:00:38.845000
985	00:00:38.884000
986	00:00:38.924000
987	00:00:38.963000
988	00:00:39.003000
989	00:00:39.042000
990	00:00:39.082000
991	00:00:39.121000
992	00:00:39.161000
993	00:00:39.200000
994	00:00:39.240000
995	00:00:39.279000
996	00:00:39.319000
997	00:00:39.358000
998	00:00:39.398000
999	00:00:39.437000
1000	00:00:39.477000
1001	00:00:39.516000
1002	00:00:39.556000
1003	00:00:39.595000
1004	00:00:39.635000
1005	00:00:39.674000
1006	00:00:39.714000
1007	00:00:39.754000
1008	00:00:39.793000
1009	00:00:39.833000
1010	00:00:39.872000
1011	00:00:39.912000
1012	00:00:39.951000
1013	00:00:39.990000
1014	00:00:40.030000
1015	00:00:40.070000
1016	00:00:40.109000
1017	00:00:40.149000
1018	00:00:40.188000
1019	00:00:40.228000
1020	00:00:40.267000
1021	00:00:40.307000
1022	00:00:40.346000
1023	00:00:40.386000
1024	00:00:40.425000
1025	00:00:40.465000
1026	00:00:40.504000
1027	00:00:40.544000
1028	00:00:40.583000
1029	00:00:40.623000
1030	00:00:40.662000
1031	00:00:40.702000
1032	00:00:40.741000
1033	00:00:40.781000
1034	00:00:40.820000
1035	00:00:40.860000
1036	00:00:40.899000
1037	00:00:40.939000
1038	00:00:40.978000
1039	00:00:41.018000
1040	00:00:41.057000
1041	00:00:41.097000
1042	00:00:41.136000
1043	00:00:41.176000
1044	00:00:41.215000
1045	00:00:41.255000
1046	00:00:41.294000
1047	00:00:41.334000
1048	00:00:41.373000
1049	00:00:41.413000
1050	00:00:41.452000
1051	00:00:41.492000
1052	00:00:41.532000
1053	00:00:41.571000
1054	00:00:41.611000
1055	00:00:41.650000
1056	00:00:41.690000
1057	00:00:41.729000
1058	00:00:41.769000
1059	00:00:41.808000
1060	00:00:41.848000
1061	00:00:41.887000
1062	00:00:41.927000
1063	00:00:41.966000
1064	00:00:42.006000
1065	00:00:42.045000
1066	00:00:42.085000
1067	00:00:42.124000
1068	00:00:42.164000
1069	00:00:42.203000
1070	00:00:42.243000
1071	00:00:42.282000
1072	00:00:42.322000
1073	00:00:42.361000
1074	00:00:42.401000
1075	00:00:42.440000
1076	00:00:42.480000
1077	00:00:42.519000
1078	00:00:42.559000
1079	00:00:42.598000
1080	00:00:42.638000
1081	00:00:42.677000
1082	00:00:42.717000
1083	00:00:42.756000
1084	00:00:42.796000
1085	00:00:42.835000
1086	00:00:42.875000
1087	00:00:42.914000
1088	00:00:42.954000
1089	00:00:42.993000
1090	00:00:43.033000
1091	00:00:43.073000
1092	00:00:43.112000
1093	00:00:43.152000
1094	00:00:43.191000
1095	00:00:43.231000
1096	00:00:43.270000
1097	00:00:43.310000
1098	00:00:43.349000
1099	00:00:43.389000
1100	00:00:43.428000
1101	00:00:43.468000
1102	00:00:43.507000
1103	00:00:43.547000
1104	00:00:43.586000
1105	00:00:43.626000
1106	00:00:43.665000
1107	00:00:43.705000
1108	00:00:43.744000
1109	00:00:43.784000
1110	00:00:43.823000
1111	00:00:43.863000
1112	00:00:43.902000
1113	00:00:43.942000
1114	00:00:43.981000
1115	00:00:44.021000
1116	00:00:44.060000
1117	00:00:44.100000
1118	00:00:44.139000
1119	00:00:44.179000
1120	00:00:44.218000
1121	00:00:44.258000
1122	00:00:44.297000
1123	00:00:44.337000
1124	00:00:44.376000
1125	00:00:44.416000
1126	00:00:44.455000
1127	00:00:44.495000
1128	00:00:44.534000
1129	00:00:44.574000
1130	00:00:44.614000
1131	00:00:44.653000
1132	00:00:44.693000
1133	00:00:44.732000
1134	00:00:44.772000
1135	00:00:44.811000
1136	00:00:44.851000
1137	00:00:44.890000
1138	00:00:44.930000
1139	00:00:44.969000
1140	00:00:45.009000
1141	00:00:45.048000
1142	00:00:45.088000
1143	00:00:45.127000
1144	00:00:45.167000
1145	00:00:45.207000
1146	00:00:45.247000
1147	00:00:45.286000
1148	00:00:45.326000
1149	00:00:45.365000
1150	00:00:45.405000
1151	00:00:45.444000
1152	00:00:45.484000
1153	00:00:45.523000
1154	00:00:45.563000
1155	00:00:45.602000
1156	00:00:45.642000
1157	00:00:45.681000
1158	00:00:45.721000
1159	00:00:45.760000
1160	00:00:45.800000
1161	00:00:45.839000
1162	00:00:45.879000
1163	00:00:45.918000
1164	00:00:45.958000
1165	00:00:45.997000
1166	00:00:46.037000
1167	00:00:46.076000
1168	00:00:46.116000
1169	00:00:46.155000
1170	00:00:46.195000
1171	00:00:46.234000
1172	00:00:46.274000
1173	00:00:46.313000
1174	00:00:46.353000
1175	00:00:46.393000
1176	00:00:46.432000
1177	00:00:46.472000
1178	00:00:46.511000
1179	00:00:46.551000
1180	00:00:46.590000
1181	00:00:46.630000
1182	00:00:46.669000
1183	00:00:46.709000
1184	00:00:46.748000
1185	00:00:46.788000
1186	00:00:46.827000
1187	00:00:46.867000
1188	00:00:46.906000
1189	00:00:46.946000
1190	00:00:46.985000
1191	00:00:47.025000
1192	00:00:47.064000
1193	00:00:47.104000
1194	00:00:47.143000
1195	00:00:47.183000
1196	00:00:47.222000
1197	00:00:47.262000
1198	00:00:47.301000
1199	00:00:47.341000
1200	00:00:47.380000
1201	00:00:47.420000
1202	00:00:47.459000
1203	00:00:47.499000
1204	00:00:47.538000
1205	00:00:47.578000
1206	00:00:47.617000
1207	00:00:47.657000
1208	00:00:47.696000
1209	00:00:47.736000
1210	00:00:47.775000
1211	00:00:47.815000
1212	00:00:47.854000
1213	00:00:47.894000
1214	00:00:47.934000
1215	00:00:47.973000
1216	00:00:48.013000
1217	00:00:48.052000
1218	00:00:48.092000
1219	00:00:48.131000
1220	00:00:48.171000
1221	00:00:48.210000
1222	00:00:48.250000
1223	00:00:48.289000
1224	00:00:48.329000
1225	00:00:48.368000
1226	00:00:48.408000
1227	00:00:48.447000
1228	00:00:48.487000
1229	00:00:48.526000
1230	00:00:48.566000
1231	00:00:48.605000
1232	00:00:48.645000
1233	00:00:48.684000
1234	00:00:48.724000
1235	00:00:48.763000
1236	00:00:48.803000
1237	00:00:48.842000
1238	00:00:48.882000
1239	00:00:48.921000
1240	00:00:48.961000
1241	00:00:49
1242	00:00:49.040000
1243	00:00:49.079000
1244	00:00:49.119000
1245	00:00:49.158000
1246	00:00:49.198000
1247	00:00:49.237000
1248	00:00:49.277000
1249	00:00:49.316000
1250	00:00:49.356000
1251	00:00:49.396000
1252	00:00:49.435000
1253	00:00:49.475000
1254	00:00:49.514000
1255	00:00:49.554000
1256	00:00:49.593000
1257	00:00:49.632000
1258	00:00:49.672000
1259	00:00:49.712000
1260	00:00:49.751000
1261	00:00:49.791000
1262	00:00:49.830000
1263	00:00:49.870000
1264	00:00:49.909000
1265	00:00:49.949000
1266	00:00:49.988000
1267	00:00:50.028000
1268	00:00:50.067000
1269	00:00:50.107000
1270	00:00:50.146000
1271	00:00:50.186000
1272	00:00:50.225000
1273	00:00:50.265000
1274	00:00:50.304000
1275	00:00:50.344000
1276	00:00:50.383000
1277	00:00:50.423000
1278	00:00:50.462000
1279	00:00:50.502000
1280	00:00:50.541000
1281	00:00:50.581000
1282	00:00:50.620000
1283	00:00:50.660000
1284	00:00:50.699000
1285	00:00:50.739000
1286	00:00:50.778000
1287	00:00:50.818000
1288	00:00:50.857000
1289	00:00:50.897000
1290	00:00:50.937000
1291	00:00:50.976000
1292	00:00:51.015000
1293	00:00:51.055000
1294	00:00:51.094000
1295	00:00:51.134000
1296	00:00:51.174000
1297	00:00:51.213000
1298	00:00:51.253000
1299	00:00:51.292000
1300	00:00:51.332000
1301	00:00:51.371000
1302	00:00:51.411000
1303	00:00:51.450000
1304	00:00:51.490000
1305	00:00:51.529000
1306	00:00:51.569000
1307	00:00:51.608000
1308	00:00:51.648000
1309	00:00:51.687000
1310	00:00:51.727000
1311	00:00:51.766000
1312	00:00:51.806000
1313	00:00:51.845000
1314	00:00:51.885000
1315	00:00:51.924000
1316	00:00:51.964000
1317	00:00:52.003000
1318	00:00:52.043000
1319	00:00:52.082000
1320	00:00:52.122000
1321	00:00:52.161000
1322	00:00:52.201000
1323	00:00:52.240000
1324	00:00:52.280000
1325	00:00:52.319000
1326	00:00:52.359000
1327	00:00:52.398000
1328	00:00:52.438000
1329	00:00:52.477000
1330	00:00:52.517000
1331	00:00:52.556000
1332	00:00:52.596000
1333	00:00:52.635000
1334	00:00:52.675000
1335	00:00:52.715000
1336	00:00:52.754000
1337	00:00:52.794000
1338	00:00:52.833000
1339	00:00:52.873000
1340	00:00:52.912000
1341	00:00:52.952000
1342	00:00:52.991000
1343	00:00:53.031000
1344	00:00:53.070000
1345	00:00:53.110000
1346	00:00:53.149000
1347	00:00:53.189000
1348	00:00:53.228000
1349	00:00:53.268000
1350	00:00:53.307000
1351	00:00:53.347000
1352	00:00:53.386000
1353	00:00:53.426000
1354	00:00:53.465000
1355	00:00:53.505000
1356	00:00:53.544000
1357	00:00:53.584000
1358	00:00:53.623000
1359	00:00:53.663000
1360	00:00:53.702000
1361	00:00:53.742000
1362	00:00:53.781000
1363	00:00:53.821000
1364	00:00:53.860000
1365	00:00:53.900000
1366	00:00:53.939000
1367	00:00:53.979000
1368	00:00:54.018000
1369	00:00:54.058000
1370	00:00:54.097000
1371	00:00:54.137000
1372	00:00:54.176000
1373	00:00:54.216000
1374	00:00:54.256000
1375	00:00:54.295000
1376	00:00:54.335000
1377	00:00:54.374000
1378	00:00:54.413000
1379	00:00:54.453000
1380	00:00:54.493000
1381	00:00:54.532000
1382	00:00:54.572000
1383	00:00:54.611000
1384	00:00:54.651000
1385	00:00:54.690000
1386	00:00:54.730000
1387	00:00:54.769000
1388	00:00:54.809000
1389	00:00:54.848000
1390	00:00:54.888000
1391	00:00:54.927000
1392	00:00:54.967000
1393	00:00:55.006000
1394	00:00:55.046000
1395	00:00:55.085000
1396	00:00:55.125000
1397	00:00:55.164000
1398	00:00:55.205000
1399	00:00:55.244000
1400	00:00:55.284000
1401	00:00:55.323000
1402	00:00:55.363000
1403	00:00:55.402000
1404	00:00:55.442000
1405	00:00:55.481000
1406	00:00:55.521000
1407	00:00:55.560000
1408	00:00:55.600000
1409	00:00:55.639000
1410	00:00:55.679000
1411	00:00:55.718000
1412	00:00:55.758000
1413	00:00:55.797000
1414	00:00:55.837000
1415	00:00:55.876000
1416	00:00:55.916000
1417	00:00:55.955000
1418	00:00:55.995000
1419	00:00:56.035000
1420	00:00:56.074000
1421	00:00:56.114000
1422	00:00:56.153000
1423	00:00:56.193000
1424	00:00:56.232000
1425	00:00:56.272000
1426	00:00:56.311000
1427	00:00:56.351000
1428	00:00:56.390000
1429	00:00:56.430000
1430	00:00:56.469000
1431	00:00:56.509000
1432	00:00:56.548000
1433	00:00:56.588000
1434	00:00:56.627000
1435	00:00:56.667000
1436	00:00:56.706000
1437	00:00:56.746000
1438	00:00:56.785000
1439	00:00:56.825000
1440	00:00:56.864000
1441	00:00:56.904000
1442	00:00:56.943000
1443	00:00:56.983000
1444	00:00:57.022000
1445	00:00:57.062000
1446	00:00:57.101000
1447	00:00:57.141000
1448	00:00:57.180000
1449	00:00:57.220000
1450	00:00:57.259000
1451	00:00:57.299000
1452	00:00:57.338000
1453	00:00:57.378000
1454	00:00:57.417000
1455	00:00:57.457000
1456	00:00:57.496000
1457	00:00:57.536000
1458	00:00:57.576000
1459	00:00:57.615000
1460	00:00:57.655000
1461	00:00:57.694000
1462	00:00:57.734000
1463	00:00:57.773000
1464	00:00:57.813000
1465	00:00:57.852000
1466	00:00:57.892000
1467	00:00:57.931000
1468	00:00:57.971000
1469	00:00:58.010000
1470	00:00:58.050000
1471	00:00:58.089000
1472	00:00:58.129000
1473	00:00:58.168000
1474	00:00:58.208000
1475	00:00:58.247000
1476	00:00:58.287000
1477	00:00:58.326000
1478	00:00:58.366000
1479	00:00:58.405000
1480	00:00:58.445000
1481	00:00:58.484000
1482	00:00:58.524000
1483	00:00:58.563000
1484	00:00:58.603000
1485	00:00:58.642000
1486	00:00:58.682000
1487	00:00:58.721000
1488	00:00:58.761000
1489	00:00:58.800000
1490	00:00:58.840000
1491	00:00:58.879000
1492	00:00:58.919000
1493	00:00:58.958000
1494	00:00:58.998000
1495	00:00:59.038000
1496	00:00:59.077000
1497	00:00:59.117000
1498	00:00:59.156000
1499	00:00:59.196000
1500	00:00:59.235000
1501	00:00:59.275000

## Sheet: #6
frame	time	PC	TB	ant isth	mid isth	post isth
1	00:00:00
2	00:00:00.039000
3	00:00:00.079000
4	00:00:00.118000
5	00:00:00.158000
6	00:00:00.212000
7	00:00:00.252000
8	00:00:00.292000
9	00:00:00.332000
10	00:00:00.372000
11	00:00:00.412000
12	00:00:00.452000
13	00:00:00.492000
14	00:00:00.522000
15	00:00:00.562000
16	00:00:00.602000
17	00:00:00.642000
18	00:00:00.671000
19	00:00:00.711000
20	00:00:00.750000
21	00:00:00.790000
22	00:00:00.829000
23	00:00:00.869000
24	00:00:00.908000
25	00:00:00.948000
26	00:00:00.987000
27	00:00:01.027000
28	00:00:01.066000
29	00:00:01.106000
30	00:00:01.145000
31	00:00:01.185000
32	00:00:01.224000
33	00:00:01.264000
34	00:00:01.304000
35	00:00:01.343000
36	00:00:01.383000
37	00:00:01.422000
38	00:00:01.462000
39	00:00:01.501000
40	00:00:01.540000
41	00:00:01.580000
42	00:00:01.620000
43	00:00:01.659000
44	00:00:01.699000
45	00:00:01.738000
46	00:00:01.778000
47	00:00:01.817000
48	00:00:01.857000
49	00:00:01.896000
50	00:00:01.936000
51	00:00:01.975000
52	00:00:02.015000
53	00:00:02.054000
54	00:00:02.094000
55	00:00:02.133000
56	00:00:02.173000
57	00:00:02.212000
58	00:00:02.252000
59	00:00:02.291000
60	00:00:02.331000
61	00:00:02.370000
62	00:00:02.410000
63	00:00:02.449000
64	00:00:02.489000
65	00:00:02.528000
66	00:00:02.568000
67	00:00:02.607000
68	00:00:02.647000
69	00:00:02.686000
70	00:00:02.726000
71	00:00:02.765000
72	00:00:02.805000
73	00:00:02.845000
74	00:00:02.884000
75	00:00:02.923000
76	00:00:02.963000
77	00:00:03.002000
78	00:00:03.042000
79	00:00:03.081000
80	00:00:03.121000
81	00:00:03.161000
82	00:00:03.200000
83	00:00:03.240000
84	00:00:03.279000
85	00:00:03.319000
86	00:00:03.358000
87	00:00:03.398000
88	00:00:03.437000
89	00:00:03.477000
90	00:00:03.516000
91	00:00:03.556000
92	00:00:03.595000
93	00:00:03.635000
94	00:00:03.674000
95	00:00:03.714000
96	00:00:03.753000
97	00:00:03.793000
98	00:00:03.832000
99	00:00:03.872000
100	00:00:03.911000
101	00:00:03.951000
102	00:00:03.990000
103	00:00:04.030000
104	00:00:04.069000
105	00:00:04.109000
106	00:00:04.148000
107	00:00:04.188000
108	00:00:04.227000
109	00:00:04.267000
110	00:00:04.306000
111	00:00:04.346000
112	00:00:04.385000
113	00:00:04.425000
114	00:00:04.464000
115	00:00:04.504000
116	00:00:04.543000
117	00:00:04.583000
118	00:00:04.623000
119	00:00:04.662000
120	00:00:04.702000
121	00:00:04.741000
122	00:00:04.781000
123	00:00:04.820000
124	00:00:04.860000
125	00:00:04.899000
126	00:00:04.939000
127	00:00:04.978000
128	00:00:05.018000
129	00:00:05.057000
130	00:00:05.097000
131	00:00:05.136000
132	00:00:05.176000
133	00:00:05.215000
134	00:00:05.256000
135	00:00:05.295000
136	00:00:05.335000
137	00:00:05.374000
138	00:00:05.414000
139	00:00:05.453000
140	00:00:05.493000
141	00:00:05.532000
142	00:00:05.572000
143	00:00:05.611000
144	00:00:05.651000
145	00:00:05.690000
146	00:00:05.730000
147	00:00:05.769000
148	00:00:05.809000
149	00:00:05.848000
150	00:00:05.888000
151	00:00:05.927000
152	00:00:05.967000
153	00:00:06.006000
154	00:00:06.046000
155	00:00:06.085000
156	00:00:06.125000
157	00:00:06.165000
158	00:00:06.204000
159	00:00:06.244000
160	00:00:06.283000
161	00:00:06.323000
162	00:00:06.362000
163	00:00:06.401000
164	00:00:06.441000
165	00:00:06.481000
166	00:00:06.520000
167	00:00:06.560000
168	00:00:06.599000
169	00:00:06.639000
170	00:00:06.678000
171	00:00:06.718000
172	00:00:06.757000
173	00:00:06.797000
174	00:00:06.836000
175	00:00:06.876000
176	00:00:06.915000
177	00:00:06.955000
178	00:00:06.994000
179	00:00:07.034000
180	00:00:07.073000
181	00:00:07.113000
182	00:00:07.152000
183	00:00:07.192000
184	00:00:07.231000
185	00:00:07.271000
186	00:00:07.310000
187	00:00:07.350000
188	00:00:07.389000
189	00:00:07.429000
190	00:00:07.468000
191	00:00:07.508000
192	00:00:07.547000
193	00:00:07.587000
194	00:00:07.627000
195	00:00:07.666000
196	00:00:07.705000
197	00:00:07.745000
198	00:00:07.784000
199	00:00:07.824000
200	00:00:07.863000
201	00:00:07.903000
202	00:00:07.943000
203	00:00:07.982000
204	00:00:08.022000
205	00:00:08.061000
206	00:00:08.101000
207	00:00:08.140000
208	00:00:08.180000
209	00:00:08.219000
210	00:00:08.259000
211	00:00:08.298000
212	00:00:08.338000
213	00:00:08.377000
214	00:00:08.417000
215	00:00:08.456000
216	00:00:08.496000
217	00:00:08.535000
218	00:00:08.575000
219	00:00:08.614000
220	00:00:08.654000
221	00:00:08.693000
222	00:00:08.733000
223	00:00:08.772000
224	00:00:08.812000
225	00:00:08.851000
226	00:00:08.891000
227	00:00:08.930000
228	00:00:08.970000
229	00:00:09.009000
230	00:00:09.049000
231	00:00:09.088000
232	00:00:09.128000
233	00:00:09.167000
234	00:00:09.207000
235	00:00:09.246000
236	00:00:09.286000
237	00:00:09.325000
238	00:00:09.365000
239	00:00:09.404000
240	00:00:09.444000
241	00:00:09.484000
242	00:00:09.523000
243	00:00:09.563000
244	00:00:09.602000
245	00:00:09.642000
246	00:00:09.681000
247	00:00:09.721000
248	00:00:09.760000
249	00:00:09.800000
250	00:00:09.839000
251	00:00:09.879000
252	00:00:09.918000
253	00:00:09.958000
254	00:00:09.997000
255	00:00:10.037000
256	00:00:10.076000
257	00:00:10.116000
258	00:00:10.155000
259	00:00:10.195000
260	00:00:10.234000
261	00:00:10.274000
262	00:00:10.313000
263	00:00:10.353000
264	00:00:10.392000
265	00:00:10.432000
266	00:00:10.471000
267	00:00:10.511000
268	00:00:10.550000
269	00:00:10.590000
270	00:00:10.629000
271	00:00:10.669000
272	00:00:10.708000
273	00:00:10.748000
274	00:00:10.787000
275	00:00:10.827000
276	00:00:10.866000
277	00:00:10.906000
278	00:00:10.946000
279	00:00:10.985000
280	00:00:11.025000
281	00:00:11.064000
282	00:00:11.104000
283	00:00:11.143000
284	00:00:11.183000
285	00:00:11.222000
286	00:00:11.262000
287	00:00:11.301000
288	00:00:11.341000
289	00:00:11.380000
290	00:00:11.420000
291	00:00:11.459000
292	00:00:11.499000
293	00:00:11.538000
294	00:00:11.578000
295	00:00:11.617000
296	00:00:11.657000
297	00:00:11.696000
298	00:00:11.736000
299	00:00:11.775000
300	00:00:11.815000
301	00:00:11.854000
302	00:00:11.894000
303	00:00:11.933000
304	00:00:11.973000
305	00:00:12.012000
306	00:00:12.052000
307	00:00:12.091000
308	00:00:12.131000
309	00:00:12.170000
310	00:00:12.210000
311	00:00:12.249000
312	00:00:12.289000
313	00:00:12.328000
314	00:00:12.368000
315	00:00:12.407000
316	00:00:12.447000
317	00:00:12.486000
318	00:00:12.526000
319	00:00:12.566000
320	00:00:12.605000
321	00:00:12.644000
322	00:00:12.684000
323	00:00:12.723000
324	00:00:12.763000
325	00:00:12.803000
326	00:00:12.842000
327	00:00:12.882000
328	00:00:12.921000
329	00:00:12.961000
330	00:00:13
331	00:00:13.040000
332	00:00:13.079000
333	00:00:13.119000
334	00:00:13.158000
335	00:00:13.198000
336	00:00:13.237000
337	00:00:13.277000
338	00:00:13.316000
339	00:00:13.356000
340	00:00:13.395000
341	00:00:13.435000
342	00:00:13.474000
343	00:00:13.514000
344	00:00:13.553000
345	00:00:13.593000
346	00:00:13.632000
347	00:00:13.672000
348	00:00:13.711000
349	00:00:13.751000
350	00:00:13.790000
351	00:00:13.830000
352	00:00:13.869000
353	00:00:13.909000
354	00:00:13.948000
355	00:00:13.988000
356	00:00:14.027000
357	00:00:14.067000
358	00:00:14.106000
359	00:00:14.146000
360	00:00:14.185000
361	00:00:14.225000
362	00:00:14.265000
363	00:00:14.304000
364	00:00:14.344000
365	00:00:14.383000
366	00:00:14.423000
367	00:00:14.462000
368	00:00:14.502000
369	00:00:14.541000
370	00:00:14.581000
371	00:00:14.620000
372	00:00:14.660000
373	00:00:14.699000
374	00:00:14.739000
375	00:00:14.778000
376	00:00:14.818000
377	00:00:14.857000
378	00:00:14.897000
379	00:00:14.936000
380	00:00:14.976000
381	00:00:15.015000
382	00:00:15.055000
383	00:00:15.094000
384	00:00:15.134000
385	00:00:15.173000
386	00:00:15.213000
387	00:00:15.253000
388	00:00:15.293000
389	00:00:15.332000
390	00:00:15.372000
391	00:00:15.411000
392	00:00:15.451000
393	00:00:15.490000
394	00:00:15.530000
395	00:00:15.569000
396	00:00:15.609000
397	00:00:15.648000
398	00:00:15.688000
399	00:00:15.727000
400	00:00:15.767000
401	00:00:15.807000
402	00:00:15.846000
403	00:00:15.886000
404	00:00:15.925000
405	00:00:15.965000
406	00:00:16.004000
407	00:00:16.043000
408	00:00:16.083000
409	00:00:16.123000
410	00:00:16.162000
411	00:00:16.202000
412	00:00:16.241000
413	00:00:16.281000
414	00:00:16.320000
415	00:00:16.360000
416	00:00:16.399000
417	00:00:16.439000
418	00:00:16.478000
419	00:00:16.518000
420	00:00:16.557000
421	00:00:16.597000
422	00:00:16.636000
423	00:00:16.676000
424	00:00:16.715000
425	00:00:16.755000
426	00:00:16.794000
427	00:00:16.834000
428	00:00:16.873000
429	00:00:16.913000
430	00:00:16.952000
431	00:00:16.992000
432	00:00:17.031000
433	00:00:17.071000
434	00:00:17.110000
435	00:00:17.150000
436	00:00:17.189000
437	00:00:17.229000
438	00:00:17.269000
439	00:00:17.308000
440	00:00:17.347000
441	00:00:17.387000
442	00:00:17.426000
443	00:00:17.466000
444	00:00:17.505000
445	00:00:17.545000
446	00:00:17.585000
447	00:00:17.624000
448	00:00:17.664000
449	00:00:17.703000
450	00:00:17.743000
451	00:00:17.782000
452	00:00:17.822000
453	00:00:17.861000
454	00:00:17.901000
455	00:00:17.940000
456	00:00:17.980000
457	00:00:18.019000
458	00:00:18.059000
459	00:00:18.098000
460	00:00:18.138000
461	00:00:18.177000
462	00:00:18.217000
463	00:00:18.256000
464	00:00:18.296000
465	00:00:18.335000
466	00:00:18.375000
467	00:00:18.414000
468	00:00:18.454000
469	00:00:18.493000
470	00:00:18.533000
471	00:00:18.572000
472	00:00:18.612000
473	00:00:18.651000
474	00:00:18.691000
475	00:00:18.730000
476	00:00:18.770000
477	00:00:18.809000
478	00:00:18.849000
479	00:00:18.888000
480	00:00:18.928000
481	00:00:18.967000
482	00:00:19.007000
483	00:00:19.046000
484	00:00:19.086000
485	00:00:19.126000
486	00:00:19.165000
487	00:00:19.205000
488	00:00:19.244000
489	00:00:19.284000
490	00:00:19.323000
491	00:00:19.363000
492	00:00:19.402000
493	00:00:19.442000
494	00:00:19.481000
495	00:00:19.521000
496	00:00:19.560000
497	00:00:19.600000
498	00:00:19.639000
499	00:00:19.679000
500	00:00:19.718000
501	00:00:19.758000
502	00:00:19.797000
503	00:00:19.837000
504	00:00:19.876000
505	00:00:19.916000
506	00:00:19.955000
507	00:00:19.995000
508	00:00:20.034000
509	00:00:20.074000
510	00:00:20.113000
511	00:00:20.153000
512	00:00:20.192000
513	00:00:20.232000
514	00:00:20.271000
515	00:00:20.311000
516	00:00:20.350000
517	00:00:20.390000
518	00:00:20.429000
519	00:00:20.469000
520	00:00:20.508000
521	00:00:20.548000
522	00:00:20.588000
523	00:00:20.627000
524	00:00:20.667000
525	00:00:20.706000
526	00:00:20.746000
527	00:00:20.785000
528	00:00:20.825000
529	00:00:20.864000
530	00:00:20.904000
531	00:00:20.943000
532	00:00:20.983000
533	00:00:21.022000
534	00:00:21.062000
535	00:00:21.101000
536	00:00:21.141000
537	00:00:21.180000
538	00:00:21.220000
539	00:00:21.259000
540	00:00:21.299000
541	00:00:21.338000
542	00:00:21.378000
543	00:00:21.417000
544	00:00:21.457000
545	00:00:21.496000
546	00:00:21.536000
547	00:00:21.575000
548	00:00:21.615000
549	00:00:21.654000
550	00:00:21.694000
551	00:00:21.733000
552	00:00:21.773000
553	00:00:21.812000
554	00:00:21.852000
555	00:00:21.891000
556	00:00:21.931000
557	00:00:21.970000
558	00:00:22.010000
559	00:00:22.049000
560	00:00:22.089000
561	00:00:22.128000
562	00:00:22.168000
563	00:00:22.207000
564	00:00:22.247000
565	00:00:22.286000
566	00:00:22.326000
567	00:00:22.365000
568	00:00:22.405000
569	00:00:22.445000
570	00:00:22.484000
571	00:00:22.524000
572	00:00:22.563000
573	00:00:22.603000
574	00:00:22.642000
575	00:00:22.682000
576	00:00:22.721000
577	00:00:22.761000
578	00:00:22.800000
579	00:00:22.840000
580	00:00:22.879000
581	00:00:22.919000
582	00:00:22.958000
583	00:00:22.998000
584	00:00:23.037000
585	00:00:23.077000
586	00:00:23.116000
587	00:00:23.156000
588	00:00:23.195000
589	00:00:23.235000
590	00:00:23.274000
591	00:00:23.314000
592	00:00:23.353000
593	00:00:23.393000
594	00:00:23.432000
595	00:00:23.472000
596	00:00:23.511000
597	00:00:23.551000
598	00:00:23.590000
599	00:00:23.630000
600	00:00:23.669000
601	00:00:23.709000
602	00:00:23.748000
603	00:00:23.788000
604	00:00:23.827000
605	00:00:23.867000
606	00:00:23.907000
607	00:00:23.946000
608	00:00:23.986000
609	00:00:24.025000
610	00:00:24.065000
611	00:00:24.104000
612	00:00:24.144000
613	00:00:24.183000
614	00:00:24.223000
615	00:00:24.262000
616	00:00:24.302000
617	00:00:24.341000
618	00:00:24.381000
619	00:00:24.420000
620	00:00:24.460000
621	00:00:24.499000
622	00:00:24.539000
623	00:00:24.578000
624	00:00:24.618000
625	00:00:24.657000
626	00:00:24.697000
627	00:00:24.736000
628	00:00:24.776000
629	00:00:24.815000
630	00:00:24.855000
631	00:00:24.894000
632	00:00:24.934000
633	00:00:24.973000
634	00:00:25.013000
635	00:00:25.052000
636	00:00:25.092000
637	00:00:25.131000
638	00:00:25.171000
639	00:00:25.210000
640	00:00:25.251000
641	00:00:25.290000
642	00:00:25.330000
643	00:00:25.369000
644	00:00:25.409000
645	00:00:25.449000
646	00:00:25.488000
647	00:00:25.528000
648	00:00:25.567000
649	00:00:25.607000
650	00:00:25.646000
651	00:00:25.685000
652	00:00:25.725000
653	00:00:25.765000
654	00:00:25.804000
655	00:00:25.844000
656	00:00:25.883000
657	00:00:25.923000
658	00:00:25.962000
659	00:00:26.002000
660	00:00:26.041000
661	00:00:26.081000
662	00:00:26.120000
663	00:00:26.160000
664	00:00:26.199000
665	00:00:26.239000
666	00:00:26.278000
667	00:00:26.318000
668	00:00:26.357000
669	00:00:26.397000
670	00:00:26.436000
671	00:00:26.476000
672	00:00:26.515000
673	00:00:26.555000
674	00:00:26.594000
675	00:00:26.634000
676	00:00:26.673000
677	00:00:26.713000
678	00:00:26.752000
679	00:00:26.792000
680	00:00:26.831000
681	00:00:26.871000
682	00:00:26.910000
683	00:00:26.950000
684	00:00:26.989000
685	00:00:27.029000
686	00:00:27.068000
687	00:00:27.108000
688	00:00:27.147000
689	00:00:27.187000
690	00:00:27.227000
691	00:00:27.266000
692	00:00:27.306000
693	00:00:27.345000
694	00:00:27.385000
695	00:00:27.424000
696	00:00:27.464000
697	00:00:27.503000
698	00:00:27.543000
699	00:00:27.582000
700	00:00:27.622000
701	00:00:27.661000
702	00:00:27.701000
703	00:00:27.740000
704	00:00:27.780000
705	00:00:27.819000
706	00:00:27.859000
707	00:00:27.898000
708	00:00:27.938000
709	00:00:27.977000
710	00:00:28.017000
711	00:00:28.056000
712	00:00:28.096000
713	00:00:28.135000
714	00:00:28.175000
715	00:00:28.214000
716	00:00:28.254000
717	00:00:28.293000
718	00:00:28.333000
719	00:00:28.372000
720	00:00:28.412000
721	00:00:28.451000
722	00:00:28.491000
723	00:00:28.530000
724	00:00:28.570000
725	00:00:28.609000
726	00:00:28.649000
727	00:00:28.688000
728	00:00:28.728000
729	00:00:28.768000
730	00:00:28.807000
731	00:00:28.847000
732	00:00:28.886000
733	00:00:28.926000
734	00:00:28.965000
735	00:00:29.005000
736	00:00:29.044000
737	00:00:29.084000
738	00:00:29.123000
739	00:00:29.163000
740	00:00:29.202000
741	00:00:29.242000
742	00:00:29.281000
743	00:00:29.321000
744	00:00:29.360000
745	00:00:29.400000
746	00:00:29.439000
747	00:00:29.479000
748	00:00:29.518000
749	00:00:29.558000
750	00:00:29.597000
751	00:00:29.637000
752	00:00:29.676000
753	00:00:29.716000
754	00:00:29.755000
755	00:00:29.795000
756	00:00:29.834000
757	00:00:29.874000
758	00:00:29.913000
759	00:00:29.953000
760	00:00:29.992000
761	00:00:30.032000
762	00:00:30.071000
763	00:00:30.111000
764	00:00:30.150000
765	00:00:30.190000
766	00:00:30.230000
767	00:00:30.269000
768	00:00:30.309000
769	00:00:30.348000
770	00:00:30.388000
771	00:00:30.427000
772	00:00:30.467000
773	00:00:30.506000
774	00:00:30.546000
775	00:00:30.585000
776	00:00:30.625000
777	00:00:30.664000
778	00:00:30.704000
779	00:00:30.743000
780	00:00:30.783000
781	00:00:30.822000
782	00:00:30.862000
783	00:00:30.901000
784	00:00:30.941000
785	00:00:30.980000
786	00:00:31.020000
787	00:00:31.059000
788	00:00:31.099000
789	00:00:31.138000
790	00:00:31.178000
791	00:00:31.217000
792	00:00:31.257000
793	00:00:31.296000
794	00:00:31.336000
795	00:00:31.375000
796	00:00:31.415000
797	00:00:31.454000
798	00:00:31.494000
799	00:00:31.533000
800	00:00:31.573000
801	00:00:31.612000
802	00:00:31.652000
803	00:00:31.691000
804	00:00:31.731000
805	00:00:31.770000
806	00:00:31.810000
807	00:00:31.849000
808	00:00:31.889000
809	00:00:31.928000
810	00:00:31.968000
811	00:00:32.007000
812	00:00:32.047000
813	00:00:32.087000
814	00:00:32.126000
815	00:00:32.166000
816	00:00:32.205000
817	00:00:32.245000
818	00:00:32.284000
819	00:00:32.324000
820	00:00:32.363000
821	00:00:32.403000
822	00:00:32.442000
823	00:00:32.482000
824	00:00:32.521000
825	00:00:32.561000
826	00:00:32.600000
827	00:00:32.640000
828	00:00:32.679000
829	00:00:32.719000
830	00:00:32.758000
831	00:00:32.798000
832	00:00:32.837000
833	00:00:32.877000
834	00:00:32.916000
835	00:00:32.956000
836	00:00:32.995000
837	00:00:33.035000
838	00:00:33.074000
839	00:00:33.114000
840	00:00:33.153000
841	00:00:33.193000
842	00:00:33.232000
843	00:00:33.272000
844	00:00:33.311000
845	00:00:33.351000
846	00:00:33.390000
847	00:00:33.430000
848	00:00:33.469000
849	00:00:33.509000
850	00:00:33.549000
851	00:00:33.588000
852	00:00:33.628000
853	00:00:33.667000
854	00:00:33.707000
855	00:00:33.746000
856	00:00:33.786000
857	00:00:33.825000
858	00:00:33.865000
859	00:00:33.904000
860	00:00:33.944000
861	00:00:33.983000
862	00:00:34.023000
863	00:00:34.062000
864	00:00:34.102000
865	00:00:34.141000
866	00:00:34.181000
867	00:00:34.220000
868	00:00:34.260000
869	00:00:34.299000
870	00:00:34.339000
871	00:00:34.378000
872	00:00:34.418000
873	00:00:34.457000
874	00:00:34.497000
875	00:00:34.536000
876	00:00:34.576000
877	00:00:34.615000
878	00:00:34.655000
879	00:00:34.694000
880	00:00:34.734000
881	00:00:34.773000
882	00:00:34.813000
883	00:00:34.852000
884	00:00:34.892000
885	00:00:34.931000
886	00:00:34.971000
887	00:00:35.010000
888	00:00:35.050000
889	00:00:35.090000
890	00:00:35.129000
891	00:00:35.169000
892	00:00:35.208000
893	00:00:35.249000
894	00:00:35.288000
895	00:00:35.328000
896	00:00:35.367000
897	00:00:35.407000
898	00:00:35.446000
899	00:00:35.486000
900	00:00:35.525000
901	00:00:35.565000
902	00:00:35.604000
903	00:00:35.644000
904	00:00:35.683000
905	00:00:35.723000
906	00:00:35.762000
907	00:00:35.802000
908	00:00:35.841000
909	00:00:35.881000
910	00:00:35.920000
911	00:00:35.960000
912	00:00:35.999000
913	00:00:36.039000
914	00:00:36.078000
915	00:00:36.118000
916	00:00:36.157000
917	00:00:36.197000
918	00:00:36.236000
919	00:00:36.276000
920	00:00:36.315000
921	00:00:36.355000
922	00:00:36.394000
923	00:00:36.434000
924	00:00:36.473000
925	00:00:36.513000
926	00:00:36.552000
927	00:00:36.592000
928	00:00:36.632000
929	00:00:36.671000
930	00:00:36.710000
931	00:00:36.750000
932	00:00:36.789000
933	00:00:36.829000
934	00:00:36.869000
935	00:00:36.908000
936	00:00:36.948000
937	00:00:36.987000
938	00:00:37.027000
939	00:00:37.066000
940	00:00:37.106000
941	00:00:37.145000
942	00:00:37.185000
943	00:00:37.224000
944	00:00:37.264000
945	00:00:37.303000
946	00:00:37.343000
947	00:00:37.382000
948	00:00:37.422000
949	00:00:37.461000
950	00:00:37.501000
951	00:00:37.540000
952	00:00:37.580000
953	00:00:37.619000
954	00:00:37.659000
955	00:00:37.698000
956	00:00:37.738000
957	00:00:37.777000
958	00:00:37.817000
959	00:00:37.856000
960	00:00:37.896000
961	00:00:37.935000
962	00:00:37.975000
963	00:00:38.014000
964	00:00:38.054000
965	00:00:38.093000
966	00:00:38.133000
967	00:00:38.172000
968	00:00:38.212000
969	00:00:38.251000
970	00:00:38.291000
971	00:00:38.330000
972	00:00:38.370000
973	00:00:38.410000
974	00:00:38.449000
975	00:00:38.489000
976	00:00:38.528000
977	00:00:38.568000
978	00:00:38.607000
979	00:00:38.647000
980	00:00:38.686000
981	00:00:38.726000
982	00:00:38.765000
983	00:00:38.805000
984	00:00:38.844000
985	00:00:38.884000
986	00:00:38.923000
987	00:00:38.963000
988	00:00:39.002000
989	00:00:39.042000
990	00:00:39.081000
991	00:00:39.121000
992	00:00:39.160000
993	00:00:39.200000
994	00:00:39.239000
995	00:00:39.279000
996	00:00:39.318000
997	00:00:39.358000
998	00:00:39.397000
999	00:00:39.437000
1000	00:00:39.476000
1001	00:00:39.516000
1002	00:00:39.555000
1003	00:00:39.595000
1004	00:00:39.634000
1005	00:00:39.674000
1006	00:00:39.713000

## Sheet: #7
frame	time	PC	TB	ant isth	mid isth	post isth
750	00:00:29.598000
751	00:00:29.637000
752	00:00:29.677000
753	00:00:29.716000
754	00:00:29.756000
755	00:00:29.795000
756	00:00:29.835000
757	00:00:29.874000
758	00:00:29.914000
759	00:00:29.953000
760	00:00:29.993000
761	00:00:30.032000
762	00:00:30.072000
763	00:00:30.111000
764	00:00:30.151000
765	00:00:30.191000
766	00:00:30.230000
767	00:00:30.270000
768	00:00:30.309000
769	00:00:30.349000
770	00:00:30.388000
771	00:00:30.428000
772	00:00:30.467000
773	00:00:30.507000
774	00:00:30.546000
775	00:00:30.586000
776	00:00:30.625000
777	00:00:30.665000
778	00:00:30.704000
779	00:00:30.744000
780	00:00:30.783000
781	00:00:30.823000
782	00:00:30.862000
783	00:00:30.902000
784	00:00:30.941000
785	00:00:30.981000
786	00:00:31.020000
787	00:00:31.060000
788	00:00:31.099000
789	00:00:31.139000
790	00:00:31.178000
791	00:00:31.218000
792	00:00:31.257000
793	00:00:31.297000
794	00:00:31.336000
795	00:00:31.376000
796	00:00:31.415000
797	00:00:31.455000
798	00:00:31.494000
799	00:00:31.534000
800	00:00:31.573000
801	00:00:31.613000
802	00:00:31.652000
803	00:00:31.692000
804	00:00:31.732000
805	00:00:31.771000
806	00:00:31.811000
807	00:00:31.850000
808	00:00:31.890000
809	00:00:31.929000
810	00:00:31.969000
811	00:00:32.008000
812	00:00:32.048000
813	00:00:32.087000
814	00:00:32.127000
815	00:00:32.166000
816	00:00:32.206000
817	00:00:32.245000
818	00:00:32.285000
819	00:00:32.324000
820	00:00:32.364000
821	00:00:32.403000
822	00:00:32.443000
823	00:00:32.482000
824	00:00:32.522000
825	00:00:32.561000
826	00:00:32.601000
827	00:00:32.640000
828	00:00:32.680000
829	00:00:32.719000
830	00:00:32.759000
831	00:00:32.798000
832	00:00:32.838000
833	00:00:32.877000
834	00:00:32.917000
835	00:00:32.956000
836	00:00:32.996000
837	00:00:33.035000
838	00:00:33.075000
839	00:00:33.114000
840	00:00:33.154000
841	00:00:33.194000
842	00:00:33.233000
843	00:00:33.273000
844	00:00:33.312000
845	00:00:33.351000
846	00:00:33.391000
847	00:00:33.430000
848	00:00:33.470000
849	00:00:33.510000
850	00:00:33.549000
851	00:00:33.589000
852	00:00:33.628000
853	00:00:33.668000
854	00:00:33.707000
855	00:00:33.747000
856	00:00:33.786000
857	00:00:33.826000
858	00:00:33.865000
859	00:00:33.905000
860	00:00:33.944000
861	00:00:33.984000
862	00:00:34.023000
863	00:00:34.063000
864	00:00:34.102000
865	00:00:34.142000
866	00:00:34.181000
867	00:00:34.221000
868	00:00:34.260000
869	00:00:34.300000
870	00:00:34.339000
871	00:00:34.379000
872	00:00:34.418000
873	00:00:34.458000
874	00:00:34.497000
875	00:00:34.537000
876	00:00:34.576000
877	00:00:34.616000
878	00:00:34.655000
879	00:00:34.695000
880	00:00:34.734000
881	00:00:34.774000
882	00:00:34.813000
883	00:00:34.853000
884	00:00:34.892000
885	00:00:34.932000
886	00:00:34.971000
887	00:00:35.011000
888	00:00:35.051000
889	00:00:35.090000
890	00:00:35.131000
891	00:00:35.170000
892	00:00:35.210000
893	00:00:35.249000
894	00:00:35.289000
895	00:00:35.328000
896	00:00:35.368000
897	00:00:35.407000
898	00:00:35.447000
899	00:00:35.486000
900	00:00:35.526000
901	00:00:35.565000
902	00:00:35.605000
903	00:00:35.644000
904	00:00:35.684000
905	00:00:35.723000
906	00:00:35.763000
907	00:00:35.802000
908	00:00:35.842000
909	00:00:35.881000
910	00:00:35.921000
911	00:00:35.960000
912	00:00:36
913	00:00:36.039000
914	00:00:36.079000
915	00:00:36.118000
916	00:00:36.158000
917	00:00:36.197000
918	00:00:36.237000
919	00:00:36.276000
920	00:00:36.316000
921	00:00:36.355000
922	00:00:36.395000
923	00:00:36.434000
924	00:00:36.474000
925	00:00:36.514000
926	00:00:36.553000
927	00:00:36.593000
928	00:00:36.632000
929	00:00:36.672000
930	00:00:36.711000
931	00:00:36.751000
932	00:00:36.790000
933	00:00:36.830000
934	00:00:36.869000
935	00:00:36.909000
936	00:00:36.948000
937	00:00:36.988000
938	00:00:37.027000
939	00:00:37.067000
940	00:00:37.106000
941	00:00:37.146000
942	00:00:37.185000
943	00:00:37.225000
944	00:00:37.264000
945	00:00:37.304000
946	00:00:37.343000
947	00:00:37.383000
948	00:00:37.422000
949	00:00:37.462000
950	00:00:37.501000
951	00:00:37.541000
952	00:00:37.580000
953	00:00:37.620000
954	00:00:37.659000
955	00:00:37.699000
956	00:00:37.738000
957	00:00:37.778000
958	00:00:37.817000
959	00:00:37.857000
960	00:00:37.896000
961	00:00:37.936000
962	00:00:37.975000
963	00:00:38.015000
964	00:00:38.055000
965	00:00:38.094000
966	00:00:38.134000
967	00:00:38.173000
968	00:00:38.213000
969	00:00:38.252000
970	00:00:38.291000
971	00:00:38.331000
972	00:00:38.371000
973	00:00:38.410000
974	00:00:38.450000
975	00:00:38.489000
976	00:00:38.529000
977	00:00:38.568000
978	00:00:38.608000
979	00:00:38.647000
980	00:00:38.687000
981	00:00:38.726000
982	00:00:38.766000
983	00:00:38.805000
984	00:00:38.845000
985	00:00:38.884000
986	00:00:38.924000
987	00:00:38.963000
988	00:00:39.003000
989	00:00:39.042000
990	00:00:39.082000
991	00:00:39.121000
992	00:00:39.161000
993	00:00:39.200000
994	00:00:39.240000
995	00:00:39.279000
996	00:00:39.319000
997	00:00:39.358000
998	00:00:39.398000
999	00:00:39.437000
1000	00:00:39.477000
1001	00:00:39.516000
1002	00:00:39.556000
1003	00:00:39.595000
1004	00:00:39.635000
1005	00:00:39.674000
1006	00:00:39.714000
1007	00:00:39.753000
1008	00:00:39.793000
1009	00:00:39.833000
1010	00:00:39.872000
1011	00:00:39.912000
1012	00:00:39.951000
1013	00:00:39.991000
1014	00:00:40.030000
1015	00:00:40.070000
1016	00:00:40.109000
1017	00:00:40.149000
1018	00:00:40.188000
1019	00:00:40.228000
1020	00:00:40.267000
1021	00:00:40.307000
1022	00:00:40.346000
1023	00:00:40.386000
1024	00:00:40.425000
1025	00:00:40.465000
1026	00:00:40.504000
1027	00:00:40.544000
1028	00:00:40.583000
1029	00:00:40.623000
1030	00:00:40.662000
1031	00:00:40.702000
1032	00:00:40.741000
1033	00:00:40.781000
1034	00:00:40.820000
1035	00:00:40.860000
1036	00:00:40.899000
1037	00:00:40.939000
1038	00:00:40.978000
1039	00:00:41.018000
1040	00:00:41.057000
1041	00:00:41.097000
1042	00:00:41.136000
1043	00:00:41.176000
1044	00:00:41.215000
1045	00:00:41.255000
1046	00:00:41.294000
1047	00:00:41.334000
1048	00:00:41.374000
1049	00:00:41.413000
1050	00:00:41.453000
1051	00:00:41.492000
1052	00:00:41.532000
1053	00:00:41.571000
1054	00:00:41.611000
1055	00:00:41.650000
1056	00:00:41.690000
1057	00:00:41.729000
1058	00:00:41.769000
1059	00:00:41.808000
1060	00:00:41.848000
1061	00:00:41.887000
1062	00:00:41.927000
1063	00:00:41.966000
1064	00:00:42.006000
1065	00:00:42.045000
1066	00:00:42.085000
1067	00:00:42.124000
1068	00:00:42.164000
1069	00:00:42.203000
1070	00:00:42.243000
1071	00:00:42.282000
1072	00:00:42.322000
1073	00:00:42.361000
1074	00:00:42.401000
1075	00:00:42.440000
1076	00:00:42.480000
1077	00:00:42.519000
1078	00:00:42.559000
1079	00:00:42.598000
1080	00:00:42.638000
1081	00:00:42.677000
1082	00:00:42.717000
1083	00:00:42.756000
1084	00:00:42.796000
1085	00:00:42.836000
1086	00:00:42.875000
1087	00:00:42.915000
1088	00:00:42.954000
1089	00:00:42.993000
1090	00:00:43.033000
1091	00:00:43.073000
1092	00:00:43.112000
1093	00:00:43.152000
1094	00:00:43.191000
1095	00:00:43.231000
1096	00:00:43.270000
1097	00:00:43.310000
1098	00:00:43.349000
1099	00:00:43.389000
1100	00:00:43.428000
1101	00:00:43.468000
1102	00:00:43.507000
1103	00:00:43.547000
1104	00:00:43.586000
1105	00:00:43.626000
1106	00:00:43.665000
1107	00:00:43.705000
1108	00:00:43.744000
1109	00:00:43.784000
1110	00:00:43.823000
1111	00:00:43.863000
1112	00:00:43.902000
1113	00:00:43.942000
1114	00:00:43.981000
1115	00:00:44.021000
1116	00:00:44.060000
1117	00:00:44.100000
1118	00:00:44.139000
1119	00:00:44.179000
1120	00:00:44.218000
1121	00:00:44.258000
1122	00:00:44.297000
1123	00:00:44.337000
1124	00:00:44.376000
1125	00:00:44.416000
1126	00:00:44.455000
1127	00:00:44.495000
1128	00:00:44.534000
1129	00:00:44.574000
1130	00:00:44.613000
1131	00:00:44.653000
1132	00:00:44.693000
1133	00:00:44.732000
1134	00:00:44.772000
1135	00:00:44.811000
1136	00:00:44.851000
1137	00:00:44.890000
1138	00:00:44.930000
1139	00:00:44.969000
1140	00:00:45.009000
1141	00:00:45.048000
1142	00:00:45.088000
1143	00:00:45.128000
1144	00:00:45.168000
1145	00:00:45.207000
1146	00:00:45.247000
1147	00:00:45.286000
1148	00:00:45.326000
1149	00:00:45.365000
1150	00:00:45.405000
1151	00:00:45.444000
1152	00:00:45.484000
1153	00:00:45.523000
1154	00:00:45.563000
1155	00:00:45.602000
1156	00:00:45.642000
1157	00:00:45.681000
1158	00:00:45.721000
1159	00:00:45.760000
1160	00:00:45.800000
1161	00:00:45.839000
1162	00:00:45.879000
1163	00:00:45.918000
1164	00:00:45.958000
1165	00:00:45.997000
1166	00:00:46.037000
1167	00:00:46.076000
1168	00:00:46.116000
1169	00:00:46.156000
1170	00:00:46.195000
1171	00:00:46.235000
1172	00:00:46.274000
1173	00:00:46.314000
1174	00:00:46.353000
1175	00:00:46.393000
1176	00:00:46.432000
1177	00:00:46.472000
1178	00:00:46.511000
1179	00:00:46.551000
1180	00:00:46.590000
1181	00:00:46.630000
1182	00:00:46.669000
1183	00:00:46.709000
1184	00:00:46.748000
1185	00:00:46.788000
1186	00:00:46.827000
1187	00:00:46.867000
1188	00:00:46.906000
1189	00:00:46.946000
1190	00:00:46.985000
1191	00:00:47.025000
1192	00:00:47.064000
1193	00:00:47.104000
1194	00:00:47.143000
1195	00:00:47.183000
1196	00:00:47.222000
1197	00:00:47.262000
1198	00:00:47.301000
1199	00:00:47.341000
1200	00:00:47.380000
1201	00:00:47.420000
1202	00:00:47.459000
1203	00:00:47.499000
1204	00:00:47.538000
1205	00:00:47.578000
1206	00:00:47.617000
1207	00:00:47.657000
1208	00:00:47.697000
1209	00:00:47.736000
1210	00:00:47.776000
1211	00:00:47.815000
1212	00:00:47.854000
1213	00:00:47.894000
1214	00:00:47.933000
1215	00:00:47.973000
1216	00:00:48.013000
1217	00:00:48.052000
1218	00:00:48.092000
1219	00:00:48.131000
1220	00:00:48.171000
1221	00:00:48.210000
1222	00:00:48.250000
1223	00:00:48.289000
1224	00:00:48.329000
1225	00:00:48.368000
1226	00:00:48.408000
1227	00:00:48.447000
1228	00:00:48.487000
1229	00:00:48.526000
1230	00:00:48.566000
1231	00:00:48.605000
1232	00:00:48.645000
1233	00:00:48.684000
1234	00:00:48.724000
1235	00:00:48.763000
1236	00:00:48.803000
1237	00:00:48.842000
1238	00:00:48.882000
1239	00:00:48.921000
1240	00:00:48.961000
1241	00:00:49
1242	00:00:49.040000
1243	00:00:49.079000
1244	00:00:49.119000
1245	00:00:49.158000
1246	00:00:49.198000
1247	00:00:49.237000
1248	00:00:49.277000
1249	00:00:49.316000
1250	00:00:49.356000
1251	00:00:49.395000
1252	00:00:49.435000
1253	00:00:49.475000
1254	00:00:49.514000
1255	00:00:49.554000
1256	00:00:49.593000
1257	00:00:49.633000
1258	00:00:49.672000
1259	00:00:49.712000
1260	00:00:49.751000
1261	00:00:49.791000
1262	00:00:49.830000
1263	00:00:49.870000
1264	00:00:49.909000
1265	00:00:49.949000
1266	00:00:49.988000
1267	00:00:50.028000
1268	00:00:50.067000
1269	00:00:50.107000
1270	00:00:50.146000
1271	00:00:50.186000
1272	00:00:50.225000
1273	00:00:50.265000
1274	00:00:50.304000
1275	00:00:50.344000
1276	00:00:50.383000
1277	00:00:50.423000
1278	00:00:50.462000
1279	00:00:50.502000
1280	00:00:50.541000
1281	00:00:50.581000
1282	00:00:50.620000
1283	00:00:50.660000
1284	00:00:50.699000
1285	00:00:50.739000
1286	00:00:50.778000
1287	00:00:50.818000
1288	00:00:50.857000
1289	00:00:50.897000
1290	00:00:50.936000
1291	00:00:50.976000
1292	00:00:51.016000
1293	00:00:51.055000
1294	00:00:51.095000
1295	00:00:51.134000
1296	00:00:51.174000
1297	00:00:51.213000
1298	00:00:51.253000
1299	00:00:51.292000
1300	00:00:51.332000
1301	00:00:51.371000
1302	00:00:51.411000
1303	00:00:51.450000
1304	00:00:51.490000
1305	00:00:51.529000
1306	00:00:51.569000
1307	00:00:51.608000
1308	00:00:51.648000
1309	00:00:51.687000
1310	00:00:51.727000
1311	00:00:51.766000
1312	00:00:51.806000
1313	00:00:51.845000
1314	00:00:51.885000
1315	00:00:51.924000
1316	00:00:51.964000
1317	00:00:52.003000
1318	00:00:52.043000
1319	00:00:52.082000
1320	00:00:52.122000
1321	00:00:52.161000
1322	00:00:52.201000
1323	00:00:52.240000
1324	00:00:52.280000
1325	00:00:52.319000
1326	00:00:52.359000
1327	00:00:52.398000
1328	00:00:52.438000
1329	00:00:52.478000
1330	00:00:52.517000
1331	00:00:52.557000
1332	00:00:52.596000
1333	00:00:52.636000
1334	00:00:52.675000
1335	00:00:52.714000
1336	00:00:52.754000
1337	00:00:52.794000
1338	00:00:52.833000
1339	00:00:52.873000
1340	00:00:52.912000
1341	00:00:52.952000
1342	00:00:52.991000
1343	00:00:53.031000
1344	00:00:53.070000
1345	00:00:53.110000
1346	00:00:53.149000
1347	00:00:53.189000
1348	00:00:53.228000
1349	00:00:53.268000
1350	00:00:53.307000
1351	00:00:53.347000
1352	00:00:53.386000
1353	00:00:53.426000
1354	00:00:53.465000
1355	00:00:53.505000
1356	00:00:53.544000
1357	00:00:53.584000
1358	00:00:53.623000
1359	00:00:53.663000
1360	00:00:53.702000
1361	00:00:53.742000
1362	00:00:53.781000
1363	00:00:53.821000
1364	00:00:53.860000
1365	00:00:53.900000
1366	00:00:53.939000
1367	00:00:53.979000
1368	00:00:54.018000
1369	00:00:54.058000
1370	00:00:54.097000
1371	00:00:54.137000
1372	00:00:54.176000
1373	00:00:54.216000
1374	00:00:54.255000
1375	00:00:54.295000
1376	00:00:54.335000
1377	00:00:54.374000
1378	00:00:54.414000
1379	00:00:54.453000
1380	00:00:54.493000
1381	00:00:54.532000
1382	00:00:54.572000
1383	00:00:54.611000
1384	00:00:54.651000
1385	00:00:54.690000
1386	00:00:54.730000
1387	00:00:54.769000
1388	00:00:54.809000
1389	00:00:54.848000
1390	00:00:54.888000
1391	00:00:54.927000
1392	00:00:54.967000
1393	00:00:55.006000
1394	00:00:55.046000
1395	00:00:55.085000
1396	00:00:55.126000
1397	00:00:55.165000
1398	00:00:55.205000
1399	00:00:55.244000
1400	00:00:55.284000
1401	00:00:55.323000
1402	00:00:55.363000
1403	00:00:55.402000
1404	00:00:55.442000
1405	00:00:55.481000
1406	00:00:55.521000
1407	00:00:55.560000
1408	00:00:55.600000
1409	00:00:55.639000
1410	00:00:55.679000
1411	00:00:55.718000
1412	00:00:55.758000
1413	00:00:55.798000
1414	00:00:55.837000
1415	00:00:55.877000
1416	00:00:55.916000
1417	00:00:55.956000
1418	00:00:55.995000
1419	00:00:56.035000
1420	00:00:56.074000
1421	00:00:56.114000
1422	00:00:56.153000
1423	00:00:56.193000
1424	00:00:56.232000
1425	00:00:56.272000
1426	00:00:56.311000
1427	00:00:56.351000
1428	00:00:56.390000
1429	00:00:56.430000
1430	00:00:56.469000
1431	00:00:56.509000
1432	00:00:56.548000
1433	00:00:56.588000
1434	00:00:56.627000
1435	00:00:56.667000
1436	00:00:56.706000
1437	00:00:56.746000
1438	00:00:56.785000
1439	00:00:56.825000
1440	00:00:56.864000
1441	00:00:56.904000
1442	00:00:56.943000
1443	00:00:56.983000
1444	00:00:57.022000
1445	00:00:57.062000
1446	00:00:57.101000
1447	00:00:57.141000
1448	00:00:57.180000
1449	00:00:57.220000
1450	00:00:57.259000
1451	00:00:57.299000
1452	00:00:57.339000
1453	00:00:57.378000
1454	00:00:57.418000
1455	00:00:57.457000
1456	00:00:57.497000
1457	00:00:57.536000
1458	00:00:57.575000
1459	00:00:57.615000
1460	00:00:57.655000
1461	00:00:57.694000
1462	00:00:57.734000
1463	00:00:57.773000
1464	00:00:57.813000
1465	00:00:57.852000
1466	00:00:57.892000
1467	00:00:57.931000
1468	00:00:57.971000
1469	00:00:58.010000
1470	00:00:58.050000
1471	00:00:58.089000
1472	00:00:58.129000
1473	00:00:58.168000
1474	00:00:58.208000
1475	00:00:58.247000
1476	00:00:58.287000
1477	00:00:58.326000
1478	00:00:58.366000
1479	00:00:58.405000
1480	00:00:58.445000
1481	00:00:58.484000
1482	00:00:58.524000
1483	00:00:58.563000
1484	00:00:58.603000
1485	00:00:58.642000
1486	00:00:58.682000
1487	00:00:58.721000
1488	00:00:58.761000
1489	00:00:58.800000
1490	00:00:58.840000
1491	00:00:58.879000
1492	00:00:58.919000
1493	00:00:58.958000
1494	00:00:58.998000
1495	00:00:59.037000
1496	00:00:59.077000
1497	00:00:59.117000
1498	00:00:59.156000
1499	00:00:59.196000
1500	00:00:59.235000
1501	00:00:59.275000
1502	00:00:59.314000
1503	00:00:59.354000
1504	00:00:59.393000
1505	00:00:59.433000
1506	00:00:59.472000
1507	00:00:59.512000
1508	00:00:59.551000
1509	00:00:59.591000
1510	00:00:59.630000
1511	00:00:59.670000
1512	00:00:59.709000
1513	00:00:59.749000
1514	00:00:59.788000
1515	00:00:59.828000
1516	00:00:59.867000
1517	00:00:59.907000
